# Supplementary material for: Discordant financial conflicts of interest disclosures between clinical trial conference abstract and subsequent publication
Source: PeerJ. 2019 Feb 11;7:e6423. doi: 10.7717/peerj.6423 (PMC6375255; doi:10.7717/peerj.6423)
Supplement: Supplemental Information 2 — Rows with red highlighted cells—industry author, no location or FCOI data not entered. N/A- disclosure not available for abstract because author was added after abstract presentation. N/A- disclosure not available for abstract because author was removed in the subsequent publication. [file peerj-07-6423-s002.xlsx]

## Sheet: raw data
author name	author location( US, europe, ROW)	impact factor of journal	publication	ASCO abstract #	abstract # of Leadership COI or patent	abstract # of Stock/Ownership	abstract # of Honoraria	abstract # of Consulting/Advisory or expert testimony	abstract # speaker's bureau	abstract # of Research Funding	abstract # of travel	abstract # other	pub # of Leadership or patent COI	pub # of stock/ownership interests	pub # of honoraria	pub # of consulting/advisory or expert testimony	pub # of speaker's bureau	pub # of research funding	pub # travel	pub # other					discordance leadership	discordance # of stock/ownership interests	discordance # of honoraria	discordance # of consulting/advisory or expert testimony	discordance # of speaker's bureau	discordance # of research funding	discordance # travel	discordance # other
author1	ROW	36.421	https://www.ncbi.nlm.nih.gov/pubmed/28958502	LBA9007	0	0	6	4	0	2	0	0	0	0	3	0	0	0	0	0					0	0	3	4	0	2	0	0
author2	ROW	36.421	https://www.ncbi.nlm.nih.gov/pubmed/28958502	LBA9007	0	0	0	0	0	0	0	0	0	0	0	0	0	0	0	0					0	0	0	0	0	0	0	0
author3	ROW	36.421	https://www.ncbi.nlm.nih.gov/pubmed/28958502	LBA9007	0	0	0	0	0	0	0	0	0	0	0	0	0	0	0	0					0	0	0	0	0	0	0	0
author4	ROW	36.421	https://www.ncbi.nlm.nih.gov/pubmed/28958502	LBA9007	0	0	0	0	0	0	0	0	0	0	0	0	0	0	0	0					0	0	0	0	0	0	0	0
author5	ROW	36.421	https://www.ncbi.nlm.nih.gov/pubmed/28958502	LBA9007	0	0	13	0	0	17	0	0	0	0	18	0	0	24	0	0					0	0	-5	0	0	-7	0	0
author6	ROW	36.421	https://www.ncbi.nlm.nih.gov/pubmed/28958502	LBA9007	0	0	7	0	0	5	0	0	0	0	7	0	0	5	0	0					0	0	0	0	0	0	0	0
author7		36.421	https://www.ncbi.nlm.nih.gov/pubmed/28958502	LBA9007
author8		36.421	https://www.ncbi.nlm.nih.gov/pubmed/28958502	LBA9007
author9	europe	36.421	https://www.ncbi.nlm.nih.gov/pubmed/28958502	LBA9007	0	0	0	0	0	0	0	0	0	0	0	0	0	0	0	0					0	0	0	0	0	0	0	0
author10	europe	36.421	https://www.ncbi.nlm.nih.gov/pubmed/28958502	LBA9007	0	0	0	0	0	0	0	0	0	0	0	0	0	0	0	0					0	0	0	0	0	0	0	0
author11	europe	36.421	https://www.ncbi.nlm.nih.gov/pubmed/28958502	LBA9007	0	0	3	3	0	0	0	0	0	0	3	3	0	0	0	0					0	0	0	0	0	0	0	0
author12	europe	36.421	https://www.ncbi.nlm.nih.gov/pubmed/28958502	LBA9007	0	0	0	1	5	2	0	0	0	0	0	5	0	2	0	0					0	0	0	-4	5	0	0	0
author13		36.421	https://www.ncbi.nlm.nih.gov/pubmed/28958502	LBA9007
author14		36.421	https://www.ncbi.nlm.nih.gov/pubmed/28958502	LBA9007
author15		36.421	https://www.ncbi.nlm.nih.gov/pubmed/28958502	LBA9007
author16		36.421	https://www.ncbi.nlm.nih.gov/pubmed/28958502	LBA9007
author17		36.421	https://www.ncbi.nlm.nih.gov/pubmed/28958502	LBA9007
author18	ROW	36.421	https://www.ncbi.nlm.nih.gov/pubmed/28958502	LBA9007	1	1	8	18	0	11	0	0	0	1	8	17	0	11	0	0					1	0	0	1	0	0	0	0
author19	europe	79.26	https://www.ncbi.nlm.nih.gov/pubmed/28586279?dopt=Abstract	LBA9008	0	0	6	7	0	0	1	0	0	0	0	16	0	16	0	0					0	0	6	-9	0	-16	1	0
author20	usa	79.26	https://www.ncbi.nlm.nih.gov/pubmed/28586279?dopt=Abstract	LBA9008	0	0	0	0	0	1	0	0	0	0	11	11	0	0	0	0					0	0	-11	-11	0	1	0	0
author21	usa	79.26	https://www.ncbi.nlm.nih.gov/pubmed/28586279?dopt=Abstract	LBA9008	0	0	3	11	0	3	0	0	0	0	1	10	0	0	0	0					0	0	2	1	0	3	0	0
author22	usa	79.26	https://www.ncbi.nlm.nih.gov/pubmed/28586279?dopt=Abstract	LBA9008	0	0	0	7	2	15	0	0	0	0	0	6	0	0	0	0					0	0	0	1	2	15	0	0
author23	ROW	79.26	https://www.ncbi.nlm.nih.gov/pubmed/28586279?dopt=Abstract	LBA9008	0	0	5	1	0	0	0	0	0	0	0	6	0	0	0	0					0	0	5	-5	0	0	0	0
author24	ROW	79.26	https://www.ncbi.nlm.nih.gov/pubmed/28586279?dopt=Abstract	LBA9008	0	0	0	0	0	0	0	0	0	0	0	0	0	0	0	0					0	0	0	0	0	0	0	0
author25	usa	79.26	https://www.ncbi.nlm.nih.gov/pubmed/28586279?dopt=Abstract	LBA9008	0	0	5	5	2	8	0	0	0	0	0	4	4	0	0	0					0	0	5	1	-2	8	0	0
author26	europe	79.26	https://www.ncbi.nlm.nih.gov/pubmed/28586279?dopt=Abstract	LBA9008	0	0	5	6	4	2	0	0	0	0	10	10	0	1	0	0					0	0	-5	-4	4	1	0	0
author27	europe	79.26	https://www.ncbi.nlm.nih.gov/pubmed/28586279?dopt=Abstract	LBA9008	0	0	6	2	1	0	1	0	0	0	7	3	0	0	1	0					0	0	-1	-1	1	0	0	0
author28	europe	79.26	https://www.ncbi.nlm.nih.gov/pubmed/28586279?dopt=Abstract	LBA9008	0	0	0	0	0	0	0	0	0	0	0	0	0	0	0	0					0	0	0	0	0	0	0	0
author29		79.26	https://www.ncbi.nlm.nih.gov/pubmed/28586279?dopt=Abstract	LBA9008
author30		79.26	https://www.ncbi.nlm.nih.gov/pubmed/28586279?dopt=Abstract	LBA9008
author31		79.26	https://www.ncbi.nlm.nih.gov/pubmed/28586279?dopt=Abstract	LBA9008
author32		79.26	https://www.ncbi.nlm.nih.gov/pubmed/28586279?dopt=Abstract	LBA9008
author33		79.26	https://www.ncbi.nlm.nih.gov/pubmed/28586279?dopt=Abstract	LBA9008
author34		79.26	https://www.ncbi.nlm.nih.gov/pubmed/28586279?dopt=Abstract	LBA9008
author35	ROW	79.26	https://www.ncbi.nlm.nih.gov/pubmed/28586279?dopt=Abstract	LBA9008	1	1	8	18	0	11	0	0	1	0	0	0	0	0	0	0					0	1	8	18	0	11	0	0
author36		79.26		LBA9008
author37	usa	36.421	https://www.ncbi.nlm.nih.gov/pubmed/29074098?dopt=Abstract	9006	0	0	0	5	3	0	0	0	0	0	4	11	0	3	0	0					0	0	-4	-6	3	-3	0	0
author38	europe	36.421	https://www.ncbi.nlm.nih.gov/pubmed/29074098?dopt=Abstract	9006	0	0	0	0	0	0	0	0	0	0	0	5	3	0	0	0					0	0	0	-5	-3	0	0	0
author39	usa	36.421	https://www.ncbi.nlm.nih.gov/pubmed/29074098?dopt=Abstract	9006	0	0	0	0	0	24	0	0	0	0	0	0	0	25	0	0					0	0	0	0	0	-1	0	0
author40	europe	36.421	https://www.ncbi.nlm.nih.gov/pubmed/29074098?dopt=Abstract	9006	0	0	0	0	0	11	5	0	0	0	0	0	0	1	0	0					0	0	0	0	0	10	5	0
author41	europe	36.421	https://www.ncbi.nlm.nih.gov/pubmed/29074098?dopt=Abstract	9006	n/a	n/a	n/a	n/a	n/a	n/a	n/a	0	0	0	0	0	0	0	0	0
author42	europe	36.421	https://www.ncbi.nlm.nih.gov/pubmed/29074098?dopt=Abstract	9006	n/a	n/a	n/a	n/a	n/a	n/a	n/a	0	0	0	0	0	0	0	0	0
author43	usa	36.421	https://www.ncbi.nlm.nih.gov/pubmed/29074098?dopt=Abstract	9006	n/a	n/a	n/a	n/a	n/a	n/a	n/a	0	0	0	0	9	0	0	1	0
author44	usa	36.421	https://www.ncbi.nlm.nih.gov/pubmed/29074098?dopt=Abstract	9006	n/a	n/a	n/a	n/a	n/a	n/a	n/a	0	0	0	0	3	0	21	0	0
author45	usa	36.421	https://www.ncbi.nlm.nih.gov/pubmed/29074098?dopt=Abstract	9006	n/a	n/a	n/a	n/a	n/a	n/a	n/a	0	0	0	0	0	0	0	0	0
author46		36.421	https://www.ncbi.nlm.nih.gov/pubmed/29074098?dopt=Abstract	9006
author47		36.421	https://www.ncbi.nlm.nih.gov/pubmed/29074098?dopt=Abstract	9006
author48		36.421	https://www.ncbi.nlm.nih.gov/pubmed/29074098?dopt=Abstract	9006
author49		36.421	https://www.ncbi.nlm.nih.gov/pubmed/29074098?dopt=Abstract	9006
author50		36.421	https://www.ncbi.nlm.nih.gov/pubmed/29074098?dopt=Abstract	9006
author51	ROW	36.421	https://www.ncbi.nlm.nih.gov/pubmed/29074098?dopt=Abstract	9006	1	0	2	5	0	1	4	0	0	0	6	6	0	1	0	0					1	0	-4	-1	0	0	4	0
author52	usa	36.421	https://www.ncbi.nlm.nih.gov/pubmed/29074098?dopt=Abstract	9006	0	0	2	2	2	12	0	0	n/a	n/a	n/a	n/a	0	n/a	n/a	0
author53	usa	36.421	https://www.ncbi.nlm.nih.gov/pubmed/29074098?dopt=Abstract	9006	0	0	0	7	2	15	0	0	n/a	n/a	n/a	n/a	0	n/a	n/a	0
author54	usa	36.421	https://www.ncbi.nlm.nih.gov/pubmed/29074098?dopt=Abstract	9006	0	0	0	0	0	0	0	0	n/a	n/a	n/a	n/a	0	n/a	n/a	0
author55	ROW	36.421	https://www.ncbi.nlm.nih.gov/pubmed/29074098?dopt=Abstract	9006	0	0	0	0	0	0	0	0	n/a	n/a	n/a	n/a	0	n/a	n/a	0
author56	ROW	36.421	https://www.ncbi.nlm.nih.gov/pubmed/29074098?dopt=Abstract	9006	0	0	15	0	0	10	0	0	n/a	n/a	n/a	n/a	0	n/a	n/a	0
author57	ROW	36.421	https://www.ncbi.nlm.nih.gov/pubmed/29074098?dopt=Abstract	9006	0	0	9	0	0	1	0	0	n/a	n/a	n/a	n/a	0	n/a	n/a	0
author58	europe	36.421	https://www.ncbi.nlm.nih.gov/pubmed/29074098?dopt=Abstract	9006	0	0	0	0	0	0	0	0	n/a	n/a	n/a	n/a	0	n/a	n/a	0
author59		36.421	https://www.ncbi.nlm.nih.gov/pubmed/29074098?dopt=Abstract	9006
author60	ROW	47.661	https://www.ncbi.nlm.nih.gov/pubmed/29946728?dopt=Abstract	3508	0	0	0	0	0	0	0	0	0	0	0	0	0	0	0	0					0	0	0	0	0	0	0	0
author61	ROW	47.661	https://www.ncbi.nlm.nih.gov/pubmed/29946728?dopt=Abstract	3508	0	0	0	0	0	0	0	0	0	0	0	0	0	0	0	0					0	0	0	0	0	0	0	0
author62	ROW	47.661	https://www.ncbi.nlm.nih.gov/pubmed/29946728?dopt=Abstract	3508	0	0	0	0	0	0	0	0	0	0	0	4	0	0	0	0					0	0	0	-4	0	0	0	0
author63	ROW	47.661	https://www.ncbi.nlm.nih.gov/pubmed/29946728?dopt=Abstract	3508	n/a	n/a	n/a	n/a	n/a	n/a	n/a	0	0	0	0	0	0	0	0	0
author64	ROW	47.661	https://www.ncbi.nlm.nih.gov/pubmed/29946728?dopt=Abstract	3508	n/a	n/a	n/a	n/a	n/a	n/a	n/a	0	0	0	0	0	0	0	0	0
author65	ROW	47.661	https://www.ncbi.nlm.nih.gov/pubmed/29946728?dopt=Abstract	3508	0	0	0	0	0	0	0	0	0	0	0	0	0	0	0	0					0	0	0	0	0	0	0	0
author66	ROW	47.661	https://www.ncbi.nlm.nih.gov/pubmed/29946728?dopt=Abstract	3508	0	0	0	0	0	0	0	0	0	0	0	0	0	0	0	0					0	0	0	0	0	0	0	0
author67	ROW	47.661	https://www.ncbi.nlm.nih.gov/pubmed/29946728?dopt=Abstract	3508	0	0	0	0	0	0	0	0	0	0	0	0	0	0	0	0					0	0	0	0	0	0	0	0
author68	ROW	47.661	https://www.ncbi.nlm.nih.gov/pubmed/29946728?dopt=Abstract	3508	0	0	0	0	0	0	0	0	0	0	0	0	0	0	0	0					0	0	0	0	0	0	0	0
author69	ROW	47.661	https://www.ncbi.nlm.nih.gov/pubmed/29946728?dopt=Abstract	3508	0	0	0	0	0	0	0	0	0	0	0	0	0	0	0	0					0	0	0	0	0	0	0	0
author70	ROW	47.661	https://www.ncbi.nlm.nih.gov/pubmed/29946728?dopt=Abstract	3508	0	0	0	0	0	0	0	0	0	0	0	0	0	0	0	0					0	0	0	0	0	0	0	0
author71	ROW	47.661	https://www.ncbi.nlm.nih.gov/pubmed/29946728?dopt=Abstract	3508	n/a	n/a	n/a	n/a	n/a	n/a	n/a	0	0	0	0	0	0	0	0	0
author72	ROW	47.661	https://www.ncbi.nlm.nih.gov/pubmed/29946728?dopt=Abstract	3508	0	0	0	0	0	0	0	0	0	0	0	0	0	0	0	0					0	0	0	0	0	0	0	0
author73	ROW	47.661	https://www.ncbi.nlm.nih.gov/pubmed/29946728?dopt=Abstract	3508	0	0	0	0	0	0	0	0	0	0	0	0	0	0	0	0					0	0	0	0	0	0	0	0
author74	ROW	47.661	https://www.ncbi.nlm.nih.gov/pubmed/29946728?dopt=Abstract	3508	0	0	0	0	0	0	0	0	0	0	0	0	0	0	0	0					0	0	0	0	0	0	0	0
author75	ROW	47.661	https://www.ncbi.nlm.nih.gov/pubmed/29946728?dopt=Abstract	3508	0	0	0	0	0	0	0	0	0	0	0	0	0	0	0	0					0	0	0	0	0	0	0	0
author76	ROW	47.661	https://www.ncbi.nlm.nih.gov/pubmed/29946728?dopt=Abstract	3508	0	0	0	0	0	0	0	0	0	0	0	0	0	0	0	0					0	0	0	0	0	0	0	0
author77	ROW	47.661	https://www.ncbi.nlm.nih.gov/pubmed/29946728?dopt=Abstract	3508	0	0	0	0	0	0	0	0	0	0	0	0	0	0	0	0					0	0	0	0	0	0	0	0
author78	ROW	47.661	https://www.ncbi.nlm.nih.gov/pubmed/29946728?dopt=Abstract	3508	0	0	0	0	0	0	0	0	0	0	0	0	0	0	0	0					0	0	0	0	0	0	0	0
author79	ROW	47.661	https://www.ncbi.nlm.nih.gov/pubmed/29946728?dopt=Abstract	3508	0	0	0	0	0	0	0	0	0	0	0	0	0	0	0	0					0	0	0	0	0	0	0	0
author80	ROW	47.661	https://www.ncbi.nlm.nih.gov/pubmed/29946728?dopt=Abstract	3508	n/a	n/a	n/a	n/a	n/a	n/a	n/a	0	0	0	0	0	0	0	0	0
author81	ROW	47.661	https://www.ncbi.nlm.nih.gov/pubmed/29946728?dopt=Abstract	3508	n/a	n/a	n/a	n/a	n/a	n/a	n/a	0	0	0	0	0	0	0	0	0
author82	ROW	47.661	https://www.ncbi.nlm.nih.gov/pubmed/29946728?dopt=Abstract	3508	n/a	n/a	n/a	n/a	n/a	n/a	n/a	0	0	0	0	0	0	0	0	0
author83	ROW	47.661	https://www.ncbi.nlm.nih.gov/pubmed/29946728?dopt=Abstract	3508	n/a	n/a	n/a	n/a	n/a	n/a	n/a	0	0	0	0	0	0	0	0	0
author84	ROW	47.661	https://www.ncbi.nlm.nih.gov/pubmed/29946728?dopt=Abstract	3508	n/a	n/a	n/a	n/a	n/a	n/a	n/a	0	0	0	0	0	0	0	0	0
author85	ROW	47.661	https://www.ncbi.nlm.nih.gov/pubmed/29946728?dopt=Abstract	3508	n/a	n/a	n/a	n/a	n/a	n/a	n/a	0	0	0	0	0	0	0	0	0
author86	ROW	47.661	https://www.ncbi.nlm.nih.gov/pubmed/29946728?dopt=Abstract	3508	n/a	n/a	n/a	n/a	n/a	n/a	n/a	0	0	0	0	0	0	0	0	0
author87	ROW	47.661	https://www.ncbi.nlm.nih.gov/pubmed/29946728?dopt=Abstract	3508	n/a	n/a	n/a	n/a	n/a	n/a	n/a	0	0	0	0	0	0	0	0	0
author88	ROW	47.661	https://www.ncbi.nlm.nih.gov/pubmed/29946728?dopt=Abstract	3508	n/a	n/a	n/a	n/a	n/a	n/a	n/a	0	0	0	0	0	0	0	0	0
author89		47.661		3508
author90		47.661		3508
author91		47.661		3508
author92	europe	79.26	https://www.ncbi.nlm.nih.gov/pubmed/28581356?dopt=Abstract	LBA500	0	0	0	0	0	11	0	0	0	0	0	0	0	8	0	0					0	0	0	0	0	3	0	0
author93	europe	79.26	https://www.ncbi.nlm.nih.gov/pubmed/28581356?dopt=Abstract	LBA500	0	0	0	0	0	1	0	0	0	0	0	0	0	0	0	0					0	0	0	0	0	1	0	0
author94	europe	79.26	https://www.ncbi.nlm.nih.gov/pubmed/28581356?dopt=Abstract	LBA500	0	0	1	1	0	1	2	0	0	0	0	0	0	0	0	0					0	0	1	1	0	1	2	0
author95	europe	79.26	https://www.ncbi.nlm.nih.gov/pubmed/28581356?dopt=Abstract	LBA500	0	0	0	0	0	7	0	0	0	0	0	0	0	5	0	0					0	0	0	0	0	2	0	0
author96		79.26	https://www.ncbi.nlm.nih.gov/pubmed/28581356?dopt=Abstract	LBA500
author97	europe	79.26	https://www.ncbi.nlm.nih.gov/pubmed/28581356?dopt=Abstract	LBA500	0	0	0	3	0	0	2	0	0	0	0	3	0	0	0	0					0	0	0	0	0	0	2	0
author98	europe	79.26	https://www.ncbi.nlm.nih.gov/pubmed/28581356?dopt=Abstract	LBA500	0	0	0	0	0	0	0	0	0	0	0	0	0	0	0	0					0	0	0	0	0	0	0	0
author99	europe	79.26	https://www.ncbi.nlm.nih.gov/pubmed/28581356?dopt=Abstract	LBA500	0	0	0	0	0	7	0	0	0	0	0	0	0	5	0	0					0	0	0	0	0	2	0	0
author100	europe	79.26	https://www.ncbi.nlm.nih.gov/pubmed/28581356?dopt=Abstract	LBA500	0	0	0	0	0	0	0	0	0	0	0	0	0	0	0	0					0	0	0	0	0	0	0	0
author101		79.26	https://www.ncbi.nlm.nih.gov/pubmed/28581356?dopt=Abstract	LBA500
author102		79.26	https://www.ncbi.nlm.nih.gov/pubmed/28581356?dopt=Abstract	LBA500
author103	europe	79.26	https://www.ncbi.nlm.nih.gov/pubmed/28581356?dopt=Abstract	LBA500	0	0	0	0	0	0	0	0	0	0	0	0	0	0	0	0					0	0	0	0	0	0	0	0
author104	europe	79.26	https://www.ncbi.nlm.nih.gov/pubmed/28581356?dopt=Abstract	LBA500	0	0	0	3	0	0	3	0	0	0	0	0	0	0	0	0					0	0	0	3	0	0	3	0
author105	usa	79.26	https://www.ncbi.nlm.nih.gov/pubmed/28581356?dopt=Abstract	LBA500	0	0	0	0	0	0	0	0	0	0	0	0	1	0	0	0					0	0	0	0	-1	0	0	0
author106	usa	79.26	https://www.ncbi.nlm.nih.gov/pubmed/28581356?dopt=Abstract	LBA500	0	0	0	3	0	0	1	0	0	0	0	0	0	0	0	0					0	0	0	3	0	0	1	0
author107	usa	79.26	https://www.ncbi.nlm.nih.gov/pubmed/28581356?dopt=Abstract	LBA500	0	0	0	0	0	7	0	0	0	0	0	0	0	8	0	0					0	0	0	0	0	-1	0	0
author108	europe	79.26	https://www.ncbi.nlm.nih.gov/pubmed/28581356?dopt=Abstract	LBA500	0	0	0	12	0	11	0	0	0	0	0	1	0	0	0	0					0	0	0	11	0	11	0	0
author109	usa	79.26	https://www.ncbi.nlm.nih.gov/pubmed/28581356?dopt=Abstract	LBA500	2	5	0	3	0	0	0	0	0	0	0	0	0	0	0	0					2	5	0	3	0	0	0	0
author110	usa	36.421	https://www.ncbi.nlm.nih.gov/pubmed/29530667?dopt=Abstract	4504	0	0	2	15	0	12	0	0	0	0	0	15	0	11	0	0					0	0	2	0	0	1	0	0
author111	europe	36.421	https://www.ncbi.nlm.nih.gov/pubmed/29530667?dopt=Abstract	4504	0	0	0	0	0	0	0	0	0	0	0	11	0	4	0	0					0	0	0	-11	0	-4	0	0
author112	ROW	36.421	https://www.ncbi.nlm.nih.gov/pubmed/29530667?dopt=Abstract	4504	0	0	5	1	0	1	0	0	0	0	0	29	0	4	0	0					0	0	5	-28	0	-3	0	0
author113	europe	36.421	https://www.ncbi.nlm.nih.gov/pubmed/29530667?dopt=Abstract	4504	0	0	0	2	0	0	2	0	0	0	0	0	0	2	0	0					0	0	0	2	0	-2	2	0
author114		36.421	https://www.ncbi.nlm.nih.gov/pubmed/29530667?dopt=Abstract	4504
author115	europe	36.421	https://www.ncbi.nlm.nih.gov/pubmed/29530667?dopt=Abstract	4504	0	0	0	9	2	0	2	0	0	0	0	1	0	0	0	0					0	0	0	8	2	0	2	0
author116	europe	36.421	https://www.ncbi.nlm.nih.gov/pubmed/29530667?dopt=Abstract	4504	0	0	0	5	0	2	0	0	0	0	0	5	0	2	0	0					0	0	0	0	0	0	0	0
author117	usa	36.421	https://www.ncbi.nlm.nih.gov/pubmed/29530667?dopt=Abstract	4504	0	0	0	10	0	1	0	0	0	0	0	8	0	1	0	0					0	0	0	2	0	0	0	0
author118		36.421	https://www.ncbi.nlm.nih.gov/pubmed/29530667?dopt=Abstract	4504
author119	usa	36.421	https://www.ncbi.nlm.nih.gov/pubmed/29530667?dopt=Abstract	4504	0	1	0	0	0	0	1	0	0	0	0	2	0	0	0	0					0	1	0	-2	0	0	1	0
author120	usa	36.421	https://www.ncbi.nlm.nih.gov/pubmed/29530667?dopt=Abstract	4504	0	0	3	2	0	0	0	0	0	0	0	6	0	0	0	0					0	0	3	-4	0	0	0	0
author121	usa	36.421	https://www.ncbi.nlm.nih.gov/pubmed/29530667?dopt=Abstract	4504	0	0	1	14	0	0	0	0	0	0	0	7	0	1	0	0					0	0	1	7	0	-1	0	0
author122	usa	36.421	https://www.ncbi.nlm.nih.gov/pubmed/29530667?dopt=Abstract	4504	0	2	0	3	0	24	0	0	0	0	0	0	0	0	0	0					0	2	0	3	0	24	0	0
author123	usa	36.421	https://www.ncbi.nlm.nih.gov/pubmed/29530667?dopt=Abstract	4504	0	1	0	1	0	5	1	0	0	1	0	0	0	9	0	0					0	0	0	1	0	-4	1	0
author124	ROW	36.421	https://www.ncbi.nlm.nih.gov/pubmed/29530667?dopt=Abstract	4504	0	0	3	4	3	7	0	0	0	0	0	0	0	0	0	0					0	0	3	4	3	7	0	0
author125	ROW	36.421	https://www.ncbi.nlm.nih.gov/pubmed/29530667?dopt=Abstract	4504	0	0	5	2	0	3	0	0	0	0	0	4	0	5	0	0					0	0	5	-2	0	-2	0	0
author126		36.421	https://www.ncbi.nlm.nih.gov/pubmed/29530667?dopt=Abstract	4504
author127		36.421	https://www.ncbi.nlm.nih.gov/pubmed/29530667?dopt=Abstract	4504
author128	usa	36.421	https://www.ncbi.nlm.nih.gov/pubmed/29530667?dopt=Abstract	4504	0	0	0	1	0	3	1	0	0	0	0	1	0	1	0	0					0	0	0	0	0	2	1	0
author129		36.421	https://www.ncbi.nlm.nih.gov/pubmed/29530667?dopt=Abstract	4504
author130	usa	26.303	https://www.ncbi.nlm.nih.gov/pubmed/28902533	4507	0	0	0	4	0	6	1	0	0	0	0	4	0	6	0	0					0	0	0	0	0	0	1	0
author131	usa	26.303	https://www.ncbi.nlm.nih.gov/pubmed/28902533	4507	0	0	0	3	0	0	0	0	0	1	0	5	0	0	0	0					0	-1	0	-2	0	0	0	0
author132	europe	26.303	https://www.ncbi.nlm.nih.gov/pubmed/28902533	4507	0	0	0	0	0	3	0	0	0	0	0	0	0	3	1	0					0	0	0	0	0	0	-1	0
author133	europe	26.303	https://www.ncbi.nlm.nih.gov/pubmed/28902533	4507	0	0	4	4	2	4	0	0	0	0	5	4	1	8	6	0					0	0	-1	0	1	-4	-6	0
author134	europe	26.303	https://www.ncbi.nlm.nih.gov/pubmed/28902533	4507	0	0	0	0	0	0	0	0	0	0	0	0	0	0	0	0					0	0	0	0	0	0	0	0
author135	europe	26.303	https://www.ncbi.nlm.nih.gov/pubmed/28902533	4507	0	0	0	0	0	0	0	0	0	0	0	0	0	0	0	0					0	0	0	0	0	0	0	0
author136	ROW	26.303	https://www.ncbi.nlm.nih.gov/pubmed/28902533	4507	0	0	3	3	0	4	0	0	0	0	3	3	0	5	0	0					0	0	0	0	0	-1	0	0
author137	europe	26.303	https://www.ncbi.nlm.nih.gov/pubmed/28902533	4507	0	0	9	8	0	0	4	0	0	0	11	7	0	0	4	0					0	0	-2	1	0	0	0	0
author138	usa	26.303	https://www.ncbi.nlm.nih.gov/pubmed/28902533	4507	0	0	0	1	0	3	1	0	0	0	0	6	0	6	1	0					0	0	0	-5	0	-3	0	0
author139	usa	26.303	https://www.ncbi.nlm.nih.gov/pubmed/28902533	4507	0	0	2	15	0	12	0	0	0	0	2	16	0	13	0	0					0	0	0	-1	0	-1	0	0
author140	europe	26.303	https://www.ncbi.nlm.nih.gov/pubmed/28902533	4507	0	0	0	1	1	0	1	0	0	0	1	1	0	2	0	0					0	0	-1	0	1	-2	1	0
author141	ROW	26.303	https://www.ncbi.nlm.nih.gov/pubmed/28902533	4507	0	0	0	0	0	5	0	0	0	0	0	0	0	6	0	0					0	0	0	0	0	-1	0	0
author142	ROW	26.303	https://www.ncbi.nlm.nih.gov/pubmed/28902533	4507	0	0	4	5	0	0	0	0	0	0	0	5	0	0	0	0					0	0	4	0	0	0	0	0
author143	europe	26.303	https://www.ncbi.nlm.nih.gov/pubmed/28902533	4507	0	0	3	4	0	5	5	0	0	0	3	10	9	9	10	0					0	0	0	-6	-9	-4	-5	0
author144	europe	26.303	https://www.ncbi.nlm.nih.gov/pubmed/28902533	4507	n/a	n/a	n/a	n/a	n/a	n/a	n/a	0	0	0	2	6	4	1	5	0
author145	ROW	26.303	https://www.ncbi.nlm.nih.gov/pubmed/28902533	4507	n/a	n/a	n/a	n/a	n/a	n/a	n/a	0	0	0	0	0	0	0	0	0
author146	europe	26.303	https://www.ncbi.nlm.nih.gov/pubmed/28902533	4507	n/a	n/a	n/a	n/a	n/a	n/a	n/a	0	0	0	8	4	0	8	2	0
author147	europe	26.303	https://www.ncbi.nlm.nih.gov/pubmed/28902533	4507	n/a	n/a	n/a	n/a	n/a	n/a	n/a	0	0	0	2	0	0	0	1	0
author148		26.303	https://www.ncbi.nlm.nih.gov/pubmed/28902533	4507
author149		26.303	https://www.ncbi.nlm.nih.gov/pubmed/28902533	4507
author150		26.303	https://www.ncbi.nlm.nih.gov/pubmed/28902533	4507
author151		26.303	https://www.ncbi.nlm.nih.gov/pubmed/28902533	4507
author152	europe	26.303	https://www.ncbi.nlm.nih.gov/pubmed/28902533	4507	0	3	0	5	0	0	0	0	0	4	7	9	0	0	5	0					0	-1	-7	-4	0	0	-5	0
author153	usa	26.303	https://www.ncbi.nlm.nih.gov/pubmed/28902533	4507	0	0	0	0	0	0	0	0	0	0	0	0	0	0	0	0					0	0	0	0	0	0	0	0
author154	europe	26.303	https://www.ncbi.nlm.nih.gov/pubmed/28902533	4507	0	0	0	0	0	0	0	0	0	0	12	0	0	1	0	0					0	0	-12	0	0	-1	0	0
author155	europe	26.303	https://www.ncbi.nlm.nih.gov/pubmed/28902533	4507	0	0	0	0	0	0	0	0	n/a	n/a	n/a	n/a	n/a	n/a	n/a	0
author156	usa	2.808	https://www.ncbi.nlm.nih.gov/pmc/articles/PMC5686264/	2003	0	0	1	11	0	26	0	0	0	0	0	8	0	18	6	0					0	0	1	3	0	8	-6	0
author157	europe	2.808	https://www.ncbi.nlm.nih.gov/pmc/articles/PMC5686264/	2003	0	0	0	9	0	1	0	0	0	0	9	0	0	1	0	0					0	0	-9	9	0	0	0	0
author158	ROW	2.808	https://www.ncbi.nlm.nih.gov/pmc/articles/PMC5686264/	2003	0	0	0	2	3	1	3	0	0	0	3	0	0	1	1	0					0	0	-3	2	3	0	2	0
author159	usa	2.808	https://www.ncbi.nlm.nih.gov/pmc/articles/PMC5686264/	2003	0	0	0	1	0	0	0	0	0	0	0	1	0	0	0	0					0	0	0	0	0	0	0	0
author160	usa	2.808	https://www.ncbi.nlm.nih.gov/pmc/articles/PMC5686264/	2003	n/a	n/a	n/a	n/a	n/a	n/a	n/a	0	0	0	0	1	0	0	0	0
author161	usa	2.808	https://www.ncbi.nlm.nih.gov/pmc/articles/PMC5686264/	2003	0	0	0	4	1	8	0	0	0	0	4	4	2	1	0	0					0	0	-4	0	-1	7	0	0
author162	ROW	2.808	https://www.ncbi.nlm.nih.gov/pmc/articles/PMC5686264/	2003	0	0	1	1	0	0	0	0	0	0	1	1	0	0	0	0					0	0	0	0	0	0	0	0
author163	usa	2.808	https://www.ncbi.nlm.nih.gov/pmc/articles/PMC5686264/	2003	0	0	0	0	0	0	0	0	0	0	0	0	0	0	0	0					0	0	0	0	0	0	0	0
author164	usa	2.808	https://www.ncbi.nlm.nih.gov/pmc/articles/PMC5686264/	2003	0	0	1	2	0	1	0	0	0	0	0	3	0	1	0	0					0	0	1	-1	0	0	0	0
author165	usa	2.808	https://www.ncbi.nlm.nih.gov/pmc/articles/PMC5686264/	2003	0	0	0	0	0	16	0	0	0	0	0	0	0	7	0	0					0	0	0	0	0	9	0	0
author166	usa	2.808	https://www.ncbi.nlm.nih.gov/pmc/articles/PMC5686264/	2003	0	0	0	0	0	7	0	0	0	0	0	0	0	0	0	0					0	0	0	0	0	7	0	0
author167	ROW	2.808	https://www.ncbi.nlm.nih.gov/pmc/articles/PMC5686264/	2003	0	0	0	0	0	1	0	0	0	0	0	0	0	1	0	0					0	0	0	0	0	0	0	0
author168	ROW	2.808	https://www.ncbi.nlm.nih.gov/pmc/articles/PMC5686264/	2003	0	0	0	0	0	0	0	0	0	0	0	1	0	0	0	0					0	0	0	-1	0	0	0	0
author169	usa	2.808	https://www.ncbi.nlm.nih.gov/pmc/articles/PMC5686264/	2003	n/a	n/a	n/a	n/a	n/a	n/a	n/a	0	0	0	0	1	0	0	0	0
author170	ROW	2.808	https://www.ncbi.nlm.nih.gov/pmc/articles/PMC5686264/	2003	n/a	n/a	n/a	n/a	n/a	n/a	n/a	0	0	1	0	1	0	2	1	0
author171		2.808	https://www.ncbi.nlm.nih.gov/pmc/articles/PMC5686264/	2003
author172		2.808	https://www.ncbi.nlm.nih.gov/pmc/articles/PMC5686264/	2003
author173		2.808	https://www.ncbi.nlm.nih.gov/pmc/articles/PMC5686264/	2003
author174		2.808	https://www.ncbi.nlm.nih.gov/pmc/articles/PMC5686264/	2003
author175		2.808	https://www.ncbi.nlm.nih.gov/pmc/articles/PMC5686264/	2003
author176		2.808	https://www.ncbi.nlm.nih.gov/pmc/articles/PMC5686264/	2003
author177		2.808	https://www.ncbi.nlm.nih.gov/pmc/articles/PMC5686264/	2003
author178		2.808	https://www.ncbi.nlm.nih.gov/pmc/articles/PMC5686264/	2003
author179	usa	2.808	https://www.ncbi.nlm.nih.gov/pmc/articles/PMC5686264/	2003	0	0	16	15	0	8	0	0	0	0	12	12	2	3	0	0					0	0	4	3	-2	5	0	0
author180	usa	26.303	https://www.ncbi.nlm.nih.gov/pubmed/29232172	4008	0	0	0	0	0	0	0	0	0	0	0	2	0	1	0	0					0	0	0	-2	0	-1	0	0
author181	usa	26.303	https://www.ncbi.nlm.nih.gov/pubmed/29232172	4008	1	1	0	1	0	6	0	0	1	1	0	1	0	6	0	0					0	0	0	0	0	0	0	0
author182	usa	26.303	https://www.ncbi.nlm.nih.gov/pubmed/29232172	4008	0	3	0	3	0	0	0	0	0	1	0	3	0	0	0	0					0	2	0	0	0	0	0	0
author183	usa	26.303	https://www.ncbi.nlm.nih.gov/pubmed/29232172	4008	0	0	0	1	2	0	0	0	0	0	0	1	2	0	0	0					0	0	0	0	0	0	0	0
author184	usa	26.303	https://www.ncbi.nlm.nih.gov/pubmed/29232172	4008	0	0	0	1	0	5	1	0	0	0	0	3	0	8	1	0					0	0	0	-2	0	-3	0	0
author185	usa	26.303	https://www.ncbi.nlm.nih.gov/pubmed/29232172	4008	4	0	2	0	3	1	0	0	1	4	3	0	3	0	2	0					3	-4	-1	0	0	1	-2	0
author186	usa	26.303	https://www.ncbi.nlm.nih.gov/pubmed/29232172	4008	5	0	16	19	14	0	21	0	0	0	20	0	14	0	21	0					5	0	-4	19	0	0	0	0
author187	usa	26.303	https://www.ncbi.nlm.nih.gov/pubmed/29232172	4008	0	0	0	0	0	0	0	0	0	0	0	0	0	0	0	0					0	0	0	0	0	0	0	0
author188	usa	26.303	https://www.ncbi.nlm.nih.gov/pubmed/29232172	4008	0	0	0	0	0	3	0	0	0	0	0	0	0	3	0	0					0	0	0	0	0	0	0	0
author189	usa	26.303	https://www.ncbi.nlm.nih.gov/pubmed/29232172	4008	0	0	0	2	0	1	0	0	0	0	0	3	0	1	0	0					0	0	0	-1	0	0	0	0
author190	usa	26.303	https://www.ncbi.nlm.nih.gov/pubmed/29232172	4008	n/a	n/a	n/a	n/a	n/a	n/a	n/a	0	0	0	0	1	0	4	0	0
author191	usa	26.303	https://www.ncbi.nlm.nih.gov/pubmed/29232172	4008	n/a	n/a	n/a	n/a	n/a	n/a	n/a	0	0	0	0	6	0	12	0	0
author192		26.303	https://www.ncbi.nlm.nih.gov/pubmed/29232172	4008
author193		26.303	https://www.ncbi.nlm.nih.gov/pubmed/29232172	4008
author194		26.303	https://www.ncbi.nlm.nih.gov/pubmed/29232172	4008
author195		26.303	https://www.ncbi.nlm.nih.gov/pubmed/29232172	4008
author196		26.303	https://www.ncbi.nlm.nih.gov/pubmed/29232172	4008
author197		26.303	https://www.ncbi.nlm.nih.gov/pubmed/29232172	4008
author198	usa	26.303	https://www.ncbi.nlm.nih.gov/pubmed/29232172	4008	0	0	0	4	0	0	1	0	0	0	0	4	0	1	1	0					0	0	0	0	0	-1	0	0
author199	europe	36.421	https://www.ncbi.nlm.nih.gov/pubmed/29625879?dopt=Abstract	4000	0	0	0	4	0	0	1	1	0	0	0	3	0	2	0	0					0	0	0	1	0	-2	1	1
author200	europe	36.421	https://www.ncbi.nlm.nih.gov/pubmed/29625879?dopt=Abstract	4000	0	0	2	3	0	2	3	0	0	0	0	0	0	4	0	0					0	0	2	3	0	-2	3	0
author201	europe	36.421	https://www.ncbi.nlm.nih.gov/pubmed/29625879?dopt=Abstract	4000	0	0	7	7	5	3	4	0	0	0	0	5	0	2	0	0					0	0	7	2	5	1	4	0
author202	europe	36.421	https://www.ncbi.nlm.nih.gov/pubmed/29625879?dopt=Abstract	4000	0	0	0	0	0	0	0	0	0	0	0	0	0	0	0	0					0	0	0	0	0	0	0	0
author203	europe	36.421	https://www.ncbi.nlm.nih.gov/pubmed/29625879?dopt=Abstract	4000	0	0	0	0	0	0	1	0	0	0	0	0	0	0	0	0					0	0	0	0	0	0	1	0
author204	europe	36.421	https://www.ncbi.nlm.nih.gov/pubmed/29625879?dopt=Abstract	4000	0	0	0	1	1	0	1	0	0	0	0	8	0	0	0	0					0	0	0	-7	1	0	1	0
author205	europe	36.421	https://www.ncbi.nlm.nih.gov/pubmed/29625879?dopt=Abstract	4000	0	0	0	0	0	0	0	0	0	0	0	0	0	0	0	0					0	0	0	0	0	0	0	0
author206	europe	36.421	https://www.ncbi.nlm.nih.gov/pubmed/29625879?dopt=Abstract	4000	0	0	0	8	5	1	0	0	0	0	0	0	0	0	0	0					0	0	0	8	5	1	0	0
author207	europe	36.421	https://www.ncbi.nlm.nih.gov/pubmed/29625879?dopt=Abstract	4000	0	0	1	3	0	0	3	0	0	0	0	6	0	2	0	0					0	0	1	-3	0	-2	3	0
author208	europe	36.421	https://www.ncbi.nlm.nih.gov/pubmed/29625879?dopt=Abstract	4000	0	0	3	3	2	1	2	0	0	0	0	0	0	7	0	0					0	0	3	3	2	-6	2	0
author209	europe	36.421	https://www.ncbi.nlm.nih.gov/pubmed/29625879?dopt=Abstract	4000	0	0	1	0	1	0	0	0	0	0	0	0	0	3	0	0					0	0	1	0	1	-3	0	0
author210	usa	36.421	https://www.ncbi.nlm.nih.gov/pubmed/29625879?dopt=Abstract	4000	0	0	0	1	0	5	1	0	0	0	0	0	0	2	0	0					0	0	0	1	0	3	1	0
author211	usa	36.421	https://www.ncbi.nlm.nih.gov/pubmed/29625879?dopt=Abstract	4000	0	0	2	3	0	0	0	0	0	0	0	5	0	1	0	0					0	0	2	-2	0	-1	0	0
author212	europe	36.421	https://www.ncbi.nlm.nih.gov/pubmed/29625879?dopt=Abstract	4000	n/a	n/a	n/a	n/a	n/a	n/a	n/a	0	0	0	0	0	0	0	0	0
author213	europe	36.421	https://www.ncbi.nlm.nih.gov/pubmed/29625879?dopt=Abstract	4000	0	0	0	1	0	0	0	0	0	0	0	2	0	4	0	0					0	0	0	-1	0	-4	0	0
author214	ROW	36.421	https://www.ncbi.nlm.nih.gov/pubmed/29625879?dopt=Abstract	4000	n/a	n/a	n/a	n/a	n/a	n/a	n/a	0	0	0	0	2	0	2	0	0
author215	europe	36.421	https://www.ncbi.nlm.nih.gov/pubmed/29625879?dopt=Abstract	4000	n/a	n/a	n/a	n/a	n/a	n/a	n/a	0	0	0	0	0	0	0	0	0
author216	europe	36.421	https://www.ncbi.nlm.nih.gov/pubmed/29625879?dopt=Abstract	4000	n/a	n/a	n/a	n/a	n/a	n/a	n/a	0	0	0	0	2	0	0	0	0
author217	europe	36.421	https://www.ncbi.nlm.nih.gov/pubmed/29625879?dopt=Abstract	4000	n/a	n/a	n/a	n/a	n/a	n/a	n/a	0	0	0	0	2	0	4	0	0
author218	europe	36.421	https://www.ncbi.nlm.nih.gov/pubmed/29625879?dopt=Abstract	4000	n/a	n/a	n/a	n/a	n/a	n/a	n/a	0	0	0	0	0	0	0	0	0
author219	europe	36.421	https://www.ncbi.nlm.nih.gov/pubmed/29625879?dopt=Abstract	4000	n/a	n/a	n/a	n/a	n/a	n/a	n/a	0	0	0	0	0	0	0	0	0
author220	europe	36.421	https://www.ncbi.nlm.nih.gov/pubmed/29625879?dopt=Abstract	4000	n/a	n/a	n/a	n/a	n/a	n/a	n/a	0	0	0	0	3	0	0	0	0
author221		36.421	https://www.ncbi.nlm.nih.gov/pubmed/29625879?dopt=Abstract	4000
author222		36.421	https://www.ncbi.nlm.nih.gov/pubmed/29625879?dopt=Abstract	4000
author223		36.421	https://www.ncbi.nlm.nih.gov/pubmed/29625879?dopt=Abstract	4000
author224		36.421	https://www.ncbi.nlm.nih.gov/pubmed/29625879?dopt=Abstract	4000
author225		36.421	https://www.ncbi.nlm.nih.gov/pubmed/29625879?dopt=Abstract	4000									0	0	0	0	0	0	0
author226		36.421	https://www.ncbi.nlm.nih.gov/pubmed/29625879?dopt=Abstract	4000									0	0	0	0	0	0	0
author227	europe	36.421	https://www.ncbi.nlm.nih.gov/pubmed/29625879?dopt=Abstract	4000	n/a	n/a	n/a	n/a	n/a	n/a	n/a	0	0	0	0	0	0	0	0	0
author228	europe	36.421	https://www.ncbi.nlm.nih.gov/pubmed/29625879?dopt=Abstract	4000	0	0	0	13	3	1	0	0	0	0	0	15	0	2	0	0					0	0	0	-2	3	-1	0	0
author229	usa	20.871	https://www.ncbi.nlm.nih.gov/pubmed/29543932?dopt=Abstract	4003	0	0	0	13	0	0	0	0	0	0	0	14	0	0	0	0					0	0	0	-1	0	0	0	0
author230	ROW	20.871	https://www.ncbi.nlm.nih.gov/pubmed/29543932?dopt=Abstract	4003	0	0	0	9	0	16	0	0	0	0	0	7	0	16	0	0					0	0	0	2	0	0	0	0
author231	ROW	20.871	https://www.ncbi.nlm.nih.gov/pubmed/29543932?dopt=Abstract	4003	0	0	0	0	0	5	0	0	0	0	0	0	0	6	0	0					0	0	0	0	0	-1	0	0
author232	ROW	20.871	https://www.ncbi.nlm.nih.gov/pubmed/29543932?dopt=Abstract	4003	0	0	6	0	0	0	0	0	0	0	9	3	0	3	0	0					0	0	-3	-3	0	-3	0	0
author233	ROW	20.871	https://www.ncbi.nlm.nih.gov/pubmed/29543932?dopt=Abstract	4003	0	0	7	5	0	4	0	0	0	0	0	0	0	0	0	0					0	0	7	5	0	4	0	0
author234	europe	20.871	https://www.ncbi.nlm.nih.gov/pubmed/29543932?dopt=Abstract	4003	0	0	0	0	0	0	0	0	0	0	0	0	0	0	0	0					0	0	0	0	0	0	0	0
author235	usa	20.871	https://www.ncbi.nlm.nih.gov/pubmed/29543932?dopt=Abstract	4003	0	0	2	1	0	2	0	0	0	0	0	2	0	2	0	0					0	0	2	-1	0	0	0	0
author236	usa	20.871	https://www.ncbi.nlm.nih.gov/pubmed/29543932?dopt=Abstract	4003	0	0	0	0	0	1	0	0	0	0	0	0	0	0	0	0					0	0	0	0	0	1	0	0
author237	usa	20.871	https://www.ncbi.nlm.nih.gov/pubmed/29543932?dopt=Abstract	4003	0	0	0	1	0	4	0	0	0	0	0	0	0	3	0	0					0	0	0	1	0	1	0	0
author238	europe	20.871	https://www.ncbi.nlm.nih.gov/pubmed/29543932?dopt=Abstract	4003	0	0	4	0	0	0	0	0	0	0	4	0	0	0	0	0					0	0	0	0	0	0	0	0
author239	ROW	20.871	https://www.ncbi.nlm.nih.gov/pubmed/29543932?dopt=Abstract	4003	0	0	0	2	0	0	0	0	0	0	0	2	0	0	0	0					0	0	0	0	0	0	0	0
author240	europe	20.871	https://www.ncbi.nlm.nih.gov/pubmed/29543932?dopt=Abstract	4003	0	0	0	0	0	0	0	0	0	0	0	2	0	0	0	0					0	0	0	-2	0	0	0	0
author241	europe	20.871	https://www.ncbi.nlm.nih.gov/pubmed/29543932?dopt=Abstract	4003	0	0	4	4	0	0	0	0	0	0	4	4	0	0	0	0					0	0	0	0	0	0	0	0
author242	usa	20.871	https://www.ncbi.nlm.nih.gov/pubmed/29543932?dopt=Abstract	4003	0	0	0	4	1	5	2	0	0	0	5	0	0	0	0	0					0	0	-5	4	1	5	2	0
author243	usa	20.871	https://www.ncbi.nlm.nih.gov/pubmed/29543932?dopt=Abstract	4003	0	0	10	3	4	2	0	0	0	0	0	5	1	2	0	0					0	0	10	-2	3	0	0	0
author244	ROW	20.871	https://www.ncbi.nlm.nih.gov/pubmed/29543932?dopt=Abstract	4003	n/a	n/a	n/a	n/a	n/a	n/a	n/a	0	0	0	0	0	0	1	0	0
author245	ROW	20.871	https://www.ncbi.nlm.nih.gov/pubmed/29543932?dopt=Abstract	4003	n/a	n/a	n/a	n/a	n/a	n/a	n/a	0	0	0	0	6	0	11	0	0
author246	europe	20.871	https://www.ncbi.nlm.nih.gov/pubmed/29543932?dopt=Abstract	4003	n/a	n/a	n/a	n/a	n/a	n/a	n/a	0	0	0	6	3	0	0	2	0
author247	usa	20.871	https://www.ncbi.nlm.nih.gov/pubmed/29543932?dopt=Abstract	4003	n/a	n/a	n/a	n/a	n/a	n/a	n/a	0	0	0	0	1	0	0	1	0
author248	usa	20.871	https://www.ncbi.nlm.nih.gov/pubmed/29543932?dopt=Abstract	4003	n/a	n/a	n/a	n/a	n/a	n/a	n/a	0	0	0	0	2	0	6	0	0
author249	usa	20.871	https://www.ncbi.nlm.nih.gov/pubmed/29543932?dopt=Abstract	4003	n/a	n/a	n/a	n/a	n/a	n/a	n/a	0	0	0	0	3	0	4	0	0
author250	usa	20.871	https://www.ncbi.nlm.nih.gov/pubmed/29543932?dopt=Abstract	4003	n/a	n/a	n/a	n/a	n/a	n/a	n/a	0	0	0	0	9	0	10	0	0
author251	usa	20.871	https://www.ncbi.nlm.nih.gov/pubmed/29543932?dopt=Abstract	4003	n/a	n/a	n/a	n/a	n/a	n/a	n/a	0	0	0	0	4	0	0	0	0
author252	ROW	20.871	https://www.ncbi.nlm.nih.gov/pubmed/29543932?dopt=Abstract	4003	0	0	0	1	0	1	0	0	0	0	0	1	0	1	0	0					0	0	0	0	0	0	0	0
author253		20.871	https://www.ncbi.nlm.nih.gov/pubmed/29543932?dopt=Abstract	4003
author254		20.871	https://www.ncbi.nlm.nih.gov/pubmed/29543932?dopt=Abstract	4003
author255		20.871	https://www.ncbi.nlm.nih.gov/pubmed/29543932?dopt=Abstract	4003
author256		20.871	https://www.ncbi.nlm.nih.gov/pubmed/29543932?dopt=Abstract	4003
author257	usa	20.871	https://www.ncbi.nlm.nih.gov/pubmed/29543932?dopt=Abstract	4003	0	0	2	2	0	4	1	0	0	0	0	5	0	2	0	0					0	0	2	-3	0	2	1	0
author258		20.871		4003
author259	ROW	53.254	https://www.ncbi.nlm.nih.gov/pubmed/29433850?dopt=Abstract	4001	0	0	4	6	0	10	0	0	0	0	4	0	0	0	0	0					0	0	0	6	0	10	0	0
author260	usa	53.254	https://www.ncbi.nlm.nih.gov/pubmed/29433850?dopt=Abstract	4001	0	0	0	5	0	1	0	0	0	0	0	6	0	6	0	0					0	0	0	-1	0	-5	0	0
author261	ROW	53.254	https://www.ncbi.nlm.nih.gov/pubmed/29433850?dopt=Abstract	4001	0	0	0	0	0	0	0	0	0	0	0	0	0	0	0	0					0	0	0	0	0	0	0	0
author262	ROW	53.254	https://www.ncbi.nlm.nih.gov/pubmed/29433850?dopt=Abstract	4001	0	0	0	1	0	1	1	0	0	0	0	3	0	2	0	0					0	0	0	-2	0	-1	1	0
author263	ROW	53.254	https://www.ncbi.nlm.nih.gov/pubmed/29433850?dopt=Abstract	4001	0	0	2	0	0	0	0	0	0	0	2	0	0	0	0	0					0	0	0	0	0	0	0	0
author264	ROW	53.254	https://www.ncbi.nlm.nih.gov/pubmed/29433850?dopt=Abstract	4001	0	0	0	2	3	1	0	0	0	0	0	3	0	1	0	0					0	0	0	-1	3	0	0	0
author265	usa	53.254	https://www.ncbi.nlm.nih.gov/pubmed/29433850?dopt=Abstract	4001	0	0	0	0	4	0	0	0	0	0	0	0	0	1	0	0					0	0	0	0	4	-1	0	0
author266	ROW	53.254	https://www.ncbi.nlm.nih.gov/pubmed/29433850?dopt=Abstract	4001	0	0	3	5	0	0	0	0	0	0	0	0	0	0	0	0					0	0	3	5	0	0	0	0
author267	ROW	53.254	https://www.ncbi.nlm.nih.gov/pubmed/29433850?dopt=Abstract	4001	0	0	0	0	0	0	0	0	0	0	0	0	0	0	0	0					0	0	0	0	0	0	0	0
author268	europe	53.254	https://www.ncbi.nlm.nih.gov/pubmed/29433850?dopt=Abstract	4001	0	0	0	3	1	0	1	0	0	0	0	8	0	0	0	0					0	0	0	-5	1	0	1	0
author269	europe	53.254	https://www.ncbi.nlm.nih.gov/pubmed/29433850?dopt=Abstract	4001	0	0	2	3	0	0	1	0	0	0	0	4	0	0	0	0					0	0	2	-1	0	0	1	0
author270	europe	53.254	https://www.ncbi.nlm.nih.gov/pubmed/29433850?dopt=Abstract	4001	0	0	9	7	0	1	3	0	0	0	0	0	0	0	0	0					0	0	9	7	0	1	3	0
author271	europe	53.254	https://www.ncbi.nlm.nih.gov/pubmed/29433850?dopt=Abstract	4001	0	0	0	0	0	0	0	0	0	0	0	0	0	0	0	0					0	0	0	0	0	0	0	0
author272	europe	53.254	https://www.ncbi.nlm.nih.gov/pubmed/29433850?dopt=Abstract	4001	0	0	1	5	2	11	1	0	0	0	10	10	0	16	1	0					0	0	-9	-5	2	-5	0	0
author273	europe	53.254	https://www.ncbi.nlm.nih.gov/pubmed/29433850?dopt=Abstract	4001	0	0	0	3	0	4	0	0	0	0	0	0	0	0	0	0					0	0	0	3	0	4	0	0
author274		53.254	https://www.ncbi.nlm.nih.gov/pubmed/29433850?dopt=Abstract	4001
author275		53.254	https://www.ncbi.nlm.nih.gov/pubmed/29433850?dopt=Abstract	4001
author276		53.254	https://www.ncbi.nlm.nih.gov/pubmed/29433850?dopt=Abstract	4001
author277		53.254	https://www.ncbi.nlm.nih.gov/pubmed/29433850?dopt=Abstract	4001
author278		53.254	https://www.ncbi.nlm.nih.gov/pubmed/29433850?dopt=Abstract	4001
author279		53.254	https://www.ncbi.nlm.nih.gov/pubmed/29433850?dopt=Abstract	4001
author280	ROW	53.254	https://www.ncbi.nlm.nih.gov/pubmed/29433850?dopt=Abstract	4001	0	0	0	5	1	1	0	0	0	0	0	6	0	0	0	0					0	0	0	-1	1	1	0	0
author281	usa	79.26	https://www.ncbi.nlm.nih.gov/pubmed/29863979?dopt=Abstract	9503	0	0	0	0	0	16	0	0	0	0	0	0	0	5	0	0					0	0	0	0	0	11	0	0
author282	usa	79.26	https://www.ncbi.nlm.nih.gov/pubmed/29863979?dopt=Abstract	9503	n/a	n/a	n/a	n/a	n/a	n/a	n/a	0	0	0	4	0	0	0	0	0
author283	ROW	79.26	https://www.ncbi.nlm.nih.gov/pubmed/29863979?dopt=Abstract	9503	n/a	n/a	n/a	n/a	n/a	n/a	n/a	0	0	0	0	3	0	1	0	0
author284	usa	79.26	https://www.ncbi.nlm.nih.gov/pubmed/29863979?dopt=Abstract	9503	n/a	n/a	n/a	n/a	n/a	n/a	n/a	0	0	0	0	1	0	2	0	0
author285	ROW	79.26	https://www.ncbi.nlm.nih.gov/pubmed/29863979?dopt=Abstract	9503	n/a	n/a	n/a	n/a	n/a	n/a	n/a	0	0	0	0	5	0	1	3	0
author286	europe	79.26	https://www.ncbi.nlm.nih.gov/pubmed/29863979?dopt=Abstract	9503	n/a	n/a	n/a	n/a	n/a	n/a	n/a	0	0	0	7	1	0	10	0	0
author287	usa	79.26	https://www.ncbi.nlm.nih.gov/pubmed/29863979?dopt=Abstract	9503	n/a	n/a	n/a	n/a	n/a	n/a	n/a	0	0	0	0	1	0	1	0	0
author288	usa	79.26	https://www.ncbi.nlm.nih.gov/pubmed/29863979?dopt=Abstract	9503	n/a	n/a	n/a	n/a	n/a	n/a	n/a	0	0	0	1	0	0	1	0	0
author289	usa	79.26	https://www.ncbi.nlm.nih.gov/pubmed/29863979?dopt=Abstract	9503	n/a	n/a	n/a	n/a	n/a	n/a	n/a	0	0	0	0	0	0	11	0	0
author290	ROW	79.26	https://www.ncbi.nlm.nih.gov/pubmed/29863979?dopt=Abstract	9503	n/a	n/a	n/a	n/a	n/a	n/a	n/a	0	0	0	0	0	0	0	0	0
author291	usa	79.26	https://www.ncbi.nlm.nih.gov/pubmed/29863979?dopt=Abstract	9503	n/a	n/a	n/a	n/a	n/a	n/a	n/a	0	0	0	0	0	0	1	0	0
author292	usa	79.26	https://www.ncbi.nlm.nih.gov/pubmed/29863979?dopt=Abstract	9503	n/a	n/a	n/a	n/a	n/a	n/a	n/a	0	0	2	0	2	0	0	0	0
author293	ROW	79.26	https://www.ncbi.nlm.nih.gov/pubmed/29863979?dopt=Abstract	9503	n/a	n/a	n/a	n/a	n/a	n/a	n/a	0	0	0	0	0	0	0	0	0
author294	usa	79.26	https://www.ncbi.nlm.nih.gov/pubmed/29863979?dopt=Abstract	9503	n/a	n/a	n/a	n/a	n/a	n/a	n/a	0	0	0	0	0	0	0	0	0
author295	ROW	79.26	https://www.ncbi.nlm.nih.gov/pubmed/29863979?dopt=Abstract	9503	n/a	n/a	n/a	n/a	n/a	n/a	n/a	0	0	0	0	7	0	0	0	0
author296	usa	79.26	https://www.ncbi.nlm.nih.gov/pubmed/29863979?dopt=Abstract	9503	n/a	n/a	n/a	n/a	n/a	n/a	n/a	0	0	2	0	6	0	7	0	0
author297	usa	79.26	https://www.ncbi.nlm.nih.gov/pubmed/29863979?dopt=Abstract	9503	n/a	n/a	n/a	n/a	n/a	n/a	n/a	0	0	0	0	0	0	0	0	0
author298	europe	79.26	https://www.ncbi.nlm.nih.gov/pubmed/29863979?dopt=Abstract	9503	n/a	n/a	n/a	n/a	n/a	n/a	n/a	0	0	0	7	14	0	0	0	0
author299		79.26	https://www.ncbi.nlm.nih.gov/pubmed/29863979?dopt=Abstract	9503
author300		79.26	https://www.ncbi.nlm.nih.gov/pubmed/29863979?dopt=Abstract	9503
author301		79.26	https://www.ncbi.nlm.nih.gov/pubmed/29863979?dopt=Abstract	9503
author302		79.26	https://www.ncbi.nlm.nih.gov/pubmed/29863979?dopt=Abstract	9503
author303		79.26	https://www.ncbi.nlm.nih.gov/pubmed/29863979?dopt=Abstract	9503
author304		79.26	https://www.ncbi.nlm.nih.gov/pubmed/29863979?dopt=Abstract	9503
author305		79.26	https://www.ncbi.nlm.nih.gov/pubmed/29863979?dopt=Abstract	9503
author306		79.26	https://www.ncbi.nlm.nih.gov/pubmed/29863979?dopt=Abstract	9503
author307	usa	79.26	https://www.ncbi.nlm.nih.gov/pubmed/29863979?dopt=Abstract	9503	n/a	n/a	n/a	n/a	n/a	n/a	n/a	0	0	0	0	0	0	1	0	0
author308	europe	79.26	https://www.ncbi.nlm.nih.gov/pubmed/29863979?dopt=Abstract	9503	0	0	0	0	0	0	0	0	0	0	0	0	0	0	0	0					0	0	0	0	0	0	0	0
author309	europe	79.26	https://www.ncbi.nlm.nih.gov/pubmed/29863979?dopt=Abstract	9503	0	0	0	0	0	0	0	0	0	0	0	0	0	0	0	0					0	0	0	0	0	0	0	0
author310	usa	79.26	https://www.ncbi.nlm.nih.gov/pubmed/29863979?dopt=Abstract	9503	0	0	2	2	2	2	3	0	0	0	0	1	1	0	0	0					0	0	2	1	1	2	3	0
author311	usa	79.26	https://www.ncbi.nlm.nih.gov/pubmed/29863979?dopt=Abstract	9503	0	0	0	5	0	16	0	0	0	0	0	6	0	28	0	0					0	0	0	-1	0	-12	0	0
author312	europe	79.26	https://www.ncbi.nlm.nih.gov/pubmed/29863979?dopt=Abstract	9503	0	0	0	0	0	0	0	0	0	0	0	0	0	0	0	0					0	0	0	0	0	0	0	0
author313	usa	79.26	https://www.ncbi.nlm.nih.gov/pubmed/29863979?dopt=Abstract	9503	n/a	n/a	n/a	n/a	n/a	n/a	n/a	0	0	0	1	6	0	0	0	0
author314	usa	79.26	https://www.ncbi.nlm.nih.gov/pubmed/29863979?dopt=Abstract	9503	3	0	0	9	0	10	0	0	0	0	0	0	0	0	0	0					3	0	0	9	0	10	0	0
author315		79.26	https://www.ncbi.nlm.nih.gov/pubmed/29863979?dopt=Abstract	9503
author316		79.26	https://www.ncbi.nlm.nih.gov/pubmed/29863979?dopt=Abstract	9503
author317		79.26	https://www.ncbi.nlm.nih.gov/pubmed/29863979?dopt=Abstract	9503
author318		79.26	https://www.ncbi.nlm.nih.gov/pubmed/29863979?dopt=Abstract	9503
author319	usa	79.26	https://www.ncbi.nlm.nih.gov/pubmed/29863979?dopt=Abstract	9503	0	0	0	0	0	0	0	0	n/a	n/a	n/a	n/a	n/a	n/a	n/a	0
author320	usa	79.26	https://www.ncbi.nlm.nih.gov/pubmed/29863979?dopt=Abstract	9503	0	0	0	0	0	0	0	0	n/a	n/a	n/a	n/a	n/a	n/a	n/a	0
author321	europe	79.26	https://www.ncbi.nlm.nih.gov/pubmed/29863979?dopt=Abstract	9503	0	0	0	7	1	18	3	1	n/a	n/a	n/a	n/a	n/a	n/a	n/a	0
author322	usa	79.26	https://www.ncbi.nlm.nih.gov/pubmed/29863979?dopt=Abstract	9503	0	0	1	1	0	8	0	0	n/a	n/a	n/a	n/a	n/a	n/a	n/a	0
author323	usa	79.26	https://www.ncbi.nlm.nih.gov/pubmed/29863979?dopt=Abstract	9503	0	0	0	1	0	14	0	0	n/a	n/a	n/a	n/a	n/a	n/a	n/a	0
author324	usa	79.26	https://www.ncbi.nlm.nih.gov/pubmed/29863979?dopt=Abstract	9503	0	0	0	1	0	6	0	0	n/a	n/a	n/a	n/a	n/a	n/a	n/a	0
author325	usa	79.26	https://www.ncbi.nlm.nih.gov/pubmed/29863979?dopt=Abstract	9503	0	0	0	0	0	0	0	0	n/a	n/a	n/a	n/a	n/a	n/a	n/a	0
author326	europe	79.26	https://www.ncbi.nlm.nih.gov/pubmed/29863979?dopt=Abstract	9503	0	0	0	2	2	0	3	0	n/a	n/a	n/a	n/a	n/a	n/a	n/a	0
author327	usa	26.303	https://www.ncbi.nlm.nih.gov/pubmed/28580882?dopt=Abstract	1000	2	1	1	5	0	1	3	0	1	1	1	5	0	1	3	0					1	0	0	0	0	0	0	0
author328	ROW	26.303	https://www.ncbi.nlm.nih.gov/pubmed/28580882?dopt=Abstract	1000	0	0	0	0	0	0	0	0	0	0	0	0	0	0	0	0					0	0	0	0	0	0	0	0
author329	europe	26.303	https://www.ncbi.nlm.nih.gov/pubmed/28580882?dopt=Abstract	1000	0	0	0	0	0	0	0	0	0	0	0	0	0	0	0	0					0	0	0	0	0	0	0	0
author330	ROW	26.303	https://www.ncbi.nlm.nih.gov/pubmed/28580882?dopt=Abstract	1000	0	0	0	0	0	0	0	0	0	0	0	0	0	6	0	0					0	0	0	0	0	-6	0	0
author331	ROW	26.303	https://www.ncbi.nlm.nih.gov/pubmed/28580882?dopt=Abstract	1000	0	0	0	0	0	6	0	0	0	0	0	0	0	6	0	0					0	0	0	0	0	0	0	0
author332	europe	26.303	https://www.ncbi.nlm.nih.gov/pubmed/28580882?dopt=Abstract	1000	0	0	0	0	0	0	0	0	0	0	0	0	0	0	0	0					0	0	0	0	0	0	0	0
author333	europe	26.303	https://www.ncbi.nlm.nih.gov/pubmed/28580882?dopt=Abstract	1000	0	0	0	0	0	0	0	0	0	0	0	0	0	0	0	0					0	0	0	0	0	0	0	0
author334	ROW	26.303	https://www.ncbi.nlm.nih.gov/pubmed/28580882?dopt=Abstract	1000	0	0	0	0	0	0	0	0	0	0	0	0	0	0	0	0					0	0	0	0	0	0	0	0
author335	ROW	26.303	https://www.ncbi.nlm.nih.gov/pubmed/28580882?dopt=Abstract	1000	0	0	3	0	0	7	0	0	0	0	2	0	0	7	0	0					0	0	1	0	0	0	0	0
author336	usa	26.303	https://www.ncbi.nlm.nih.gov/pubmed/28580882?dopt=Abstract	1000	0	0	0	0	0	1	0	0	0	0	0	2	0	1	0	0					0	0	0	-2	0	0	0	0
author337	usa	26.303	https://www.ncbi.nlm.nih.gov/pubmed/28580882?dopt=Abstract	1000	0	0	0	0	0	0	0	0	0	0	0	0	0	0	0	0					0	0	0	0	0	0	0	0
author338	europe	26.303	https://www.ncbi.nlm.nih.gov/pubmed/28580882?dopt=Abstract	1000	0	0	0	0	0	0	0	0	0	0	0	0	0	0	0	0					0	0	0	0	0	0	0	0
author339		26.303	https://www.ncbi.nlm.nih.gov/pubmed/28580882?dopt=Abstract	1000
author340		26.303	https://www.ncbi.nlm.nih.gov/pubmed/28580882?dopt=Abstract	1000
author341		26.303	https://www.ncbi.nlm.nih.gov/pubmed/28580882?dopt=Abstract	1000
author342		26.303	https://www.ncbi.nlm.nih.gov/pubmed/28580882?dopt=Abstract	1000
author343		26.303	https://www.ncbi.nlm.nih.gov/pubmed/28580882?dopt=Abstract	1000
author344	europe	26.303	https://www.ncbi.nlm.nih.gov/pubmed/28580882?dopt=Abstract	1000	0	0	3	2	0	2	2	0	0	0	3	3	0	2	2	0					0	0	0	-1	0	0	0	0
author345	usa	26.303	http://ascopubs.org/doi/pdfdirect/10.1200/JCO.2017.74.7824	1004	0	0	0	0	0	0	0	0	0	0	0	6	0	0	0	0					0	0	0	-6	0	0	0	0
author346	europe	26.303	http://ascopubs.org/doi/pdfdirect/10.1200/JCO.2017.74.7824	1004	0	0	0	4	3	1	0	0	0	0	0	5	2	1	0	0					0	0	0	-1	1	0	0	0
author347	ROW	26.303	http://ascopubs.org/doi/pdfdirect/10.1200/JCO.2017.74.7824	1004	0	0	0	0	0	0	0	0	0	0	0	0	0	0	0	0					0	0	0	0	0	0	0	0
author348	ROW	26.303	http://ascopubs.org/doi/pdfdirect/10.1200/JCO.2017.74.7824	1004	0	0	0	3	0	0	0	0	0	0	0	5	0	1	0	0					0	0	0	-2	0	-1	0	0
author349	ROW	26.303	http://ascopubs.org/doi/pdfdirect/10.1200/JCO.2017.74.7824	1004	0	0	0	0	0	0	0	0	0	0	0	0	0	0	0	0					0	0	0	0	0	0	0	0
author350	europe	26.303	http://ascopubs.org/doi/pdfdirect/10.1200/JCO.2017.74.7824	1004	n/a	n/a	n/a	n/a	n/a	n/a	n/a	0	0	0	0	0	0	0	0	0
author351	europe	26.303	http://ascopubs.org/doi/pdfdirect/10.1200/JCO.2017.74.7824	1004	n/a	n/a	n/a	n/a	n/a	n/a	n/a	0	0	0	0	0	0	0	0	0
author352	usa	26.303	http://ascopubs.org/doi/pdfdirect/10.1200/JCO.2017.74.7824	1004	n/a	n/a	n/a	n/a	n/a	n/a	n/a	0	0	0	8	7	0	1	0	0
author353	europe	26.303	http://ascopubs.org/doi/pdfdirect/10.1200/JCO.2017.74.7824	1004	0	1	0	0	3	0	2	0	0	0	0	0	3	1	0	0					0	1	0	0	0	-1	2	0
author354	ROW	26.303	http://ascopubs.org/doi/pdfdirect/10.1200/JCO.2017.74.7824	1004	n/a	n/a	n/a	n/a	n/a	n/a	n/a	0	0	0	6	0	0	9	0	0
author355	ROW	26.303	http://ascopubs.org/doi/pdfdirect/10.1200/JCO.2017.74.7824	1004	n/a	n/a	n/a	n/a	n/a	n/a	n/a	0	0	0	0	4	3	0	3	0
author356		26.303	http://ascopubs.org/doi/pdfdirect/10.1200/JCO.2017.74.7824	1004
author357		26.303	http://ascopubs.org/doi/pdfdirect/10.1200/JCO.2017.74.7824	1004
author358		26.303	http://ascopubs.org/doi/pdfdirect/10.1200/JCO.2017.74.7824	1004
author359		26.303	http://ascopubs.org/doi/pdfdirect/10.1200/JCO.2017.74.7824	1004
author360	usa	24.373	http://cancerdiscovery.aacrjournals.org/content/candisc/early/2017/12/12/2159-8290.CD-17-1119.full.pdf	2508	0	0	0	0	0	0	0	0	0	0	0	2	0	1	0	0					0	0	0	-2	0	-1	0	0
author361		24.373	http://cancerdiscovery.aacrjournals.org/content/candisc/early/2017/12/12/2159-8290.CD-17-1119.full.pdf	2508
author362	usa	24.373	http://cancerdiscovery.aacrjournals.org/content/candisc/early/2017/12/12/2159-8290.CD-17-1119.full.pdf	2508	0	0	0	6	0	13	0	1	1	0	0	1	0	3	0	0					-1	0	0	5	0	10	0	1
author363	usa	24.373	http://cancerdiscovery.aacrjournals.org/content/candisc/early/2017/12/12/2159-8290.CD-17-1119.full.pdf	2508	0	0	1	1	0	6	0	0	0	0	0	0	0	0	0	0					0	0	1	1	0	6	0	0
author364	usa	24.373	http://cancerdiscovery.aacrjournals.org/content/candisc/early/2017/12/12/2159-8290.CD-17-1119.full.pdf	2508	0	0	0	3	0	2	0	0	0	0	0	0	0	0	0	0					0	0	0	3	0	2	0	0
author365	usa	24.373	http://cancerdiscovery.aacrjournals.org/content/candisc/early/2017/12/12/2159-8290.CD-17-1119.full.pdf	2508	0	0	0	3	0	14	0	0	0	0	0	0	0	0	0	0					0	0	0	3	0	14	0	0
author366	usa	24.373	http://cancerdiscovery.aacrjournals.org/content/candisc/early/2017/12/12/2159-8290.CD-17-1119.full.pdf	2508	0	0	0	0	0	0	0	0	0	0	0	0	0	0	0	0					0	0	0	0	0	0	0	0
author367	usa	24.373	http://cancerdiscovery.aacrjournals.org/content/candisc/early/2017/12/12/2159-8290.CD-17-1119.full.pdf	2508	n/a	n/a	n/a	n/a	n/a	n/a	n/a	0	0	0	0	6	0	3	0	0
author368	usa	24.373	http://cancerdiscovery.aacrjournals.org/content/candisc/early/2017/12/12/2159-8290.CD-17-1119.full.pdf	2508	n/a	n/a	n/a	n/a	n/a	n/a	n/a	0	0	0	0	0	0	0	0	0
author369	usa	24.373	http://cancerdiscovery.aacrjournals.org/content/candisc/early/2017/12/12/2159-8290.CD-17-1119.full.pdf	2508	1	0	0	25	0	15	0	0	0	0	0	6	0	0	0	0					1	0	0	19	0	15	0	0
author370	usa	24.373	http://cancerdiscovery.aacrjournals.org/content/candisc/early/2017/12/12/2159-8290.CD-17-1119.full.pdf	2508	0	0	0	3	0	15	0	0	0	0	0	6	0	0	0	0					0	0	0	-3	0	15	0	0
author371	usa	24.373	http://cancerdiscovery.aacrjournals.org/content/candisc/early/2017/12/12/2159-8290.CD-17-1119.full.pdf	2508	0	3	0	29	0	0	0	10	0	0	0	3	0	0	0	0					0	3	0	26	0	0	0	10
author372	usa	24.373	http://cancerdiscovery.aacrjournals.org/content/candisc/early/2017/12/12/2159-8290.CD-17-1119.full.pdf	2508	0	2	0	16	0	2	0	0	0	0	0	0	0	0	0	0					0	2	0	16	0	2	0	0
author373		24.373
author374	usa	24.373	http://cancerdiscovery.aacrjournals.org/content/candisc/early/2017/12/12/2159-8290.CD-17-1119.full.pdf	2508	n/a	n/a	n/a	n/a	n/a	n/a	n/a	0	0	0	0	8	0	0	0	0
author375	usa	24.373	http://cancerdiscovery.aacrjournals.org/content/candisc/early/2017/12/12/2159-8290.CD-17-1119.full.pdf	2508	0	0	0	2	0	3	0	0	0	0	0	0	0	0	0	0					0	0	0	2	0	3	0	0
author376	usa	24.373	http://cancerdiscovery.aacrjournals.org/content/candisc/early/2017/12/12/2159-8290.CD-17-1119.full.pdf	2508	0	0	0	0	0	0	0	0	0	0	0	0	0	0	0	0					0	0	0	0	0	0	0	0
author377	usa	24.373	http://cancerdiscovery.aacrjournals.org/content/candisc/early/2017/12/12/2159-8290.CD-17-1119.full.pdf	2508	0	6	0	4	0	0	0	0	0	0	0	0	0	0	0	0					0	6	0	4	0	0	0	0
author378	usa	24.373	http://cancerdiscovery.aacrjournals.org/content/candisc/early/2017/12/12/2159-8290.CD-17-1119.full.pdf	2508	0	1	4	2	2	8	2	0	1	0	2	4	2	0	0	0					-1	1	2	-2	0	8	2	0
author379		24.373	http://cancerdiscovery.aacrjournals.org/content/candisc/early/2017/12/12/2159-8290.CD-17-1119.full.pdf	2508
author380		24.373	http://cancerdiscovery.aacrjournals.org/content/candisc/early/2017/12/12/2159-8290.CD-17-1119.full.pdf	2508
author381		24.373	http://cancerdiscovery.aacrjournals.org/content/candisc/early/2017/12/12/2159-8290.CD-17-1119.full.pdf	2508
author382		24.373	http://cancerdiscovery.aacrjournals.org/content/candisc/early/2017/12/12/2159-8290.CD-17-1119.full.pdf	2508
author383		24.373	http://cancerdiscovery.aacrjournals.org/content/candisc/early/2017/12/12/2159-8290.CD-17-1119.full.pdf	2508
author384		24.373	http://cancerdiscovery.aacrjournals.org/content/candisc/early/2017/12/12/2159-8290.CD-17-1119.full.pdf	2508
author385	usa	24.373	http://cancerdiscovery.aacrjournals.org/content/candisc/early/2017/12/12/2159-8290.CD-17-1119.full.pdf	2508	0	0	0	3	0	2	0	0	0	0	0	5	0	3	0	0					0	0	0	-2	0	-1	0	0
author386	usa	24.373	http://cancerdiscovery.aacrjournals.org/content/candisc/early/2017/12/12/2159-8290.CD-17-1119.full.pdf	2508	0	0	0	3	0	5	0	0	0	0	0	1	0	0	0	0					0	0	0	2	0	5	0	0
author387	europe	26.303	https://www.ncbi.nlm.nih.gov/pubmed/30028657?dopt=Abstract	5004	1	0	2	10	5	3	7	0	1	0	2	10	5	3	9	0					0	0	0	0	0	0	-2	0
author388	europe	26.303	https://www.ncbi.nlm.nih.gov/pubmed/30028657?dopt=Abstract	5004	0	0	0	2	2	0	1	0	0	0	3	0	0	0	3	0					0	0	-3	2	2	0	-2	0
author389	ROW	26.303	https://www.ncbi.nlm.nih.gov/pubmed/30028657?dopt=Abstract	5004	0	0	2	4	0	1	2	0	0	0	1	5	0	0	4	0					0	0	1	-1	0	1	-2	0
author390	europe	26.303	https://www.ncbi.nlm.nih.gov/pubmed/30028657?dopt=Abstract	5004	0	0	0	6	0	1	3	0	0	0	0	8	0	3	3	0					0	0	0	-2	0	-2	0	0
author391		26.303	https://www.ncbi.nlm.nih.gov/pubmed/30028657?dopt=Abstract	5004
author392		26.303	https://www.ncbi.nlm.nih.gov/pubmed/30028657?dopt=Abstract	5004
author393		26.303	https://www.ncbi.nlm.nih.gov/pubmed/30028657?dopt=Abstract	5004
author394	usa	26.303	https://www.ncbi.nlm.nih.gov/pubmed/30028657?dopt=Abstract	5004	0	0	5	14	0	5	4	0	0	0	4	10	0	3	2	0					0	0	1	4	0	2	2	0
author395	usa	10.199	http://clincancerres.aacrjournals.org/content/early/2018/01/03/1078-0432.CCR-17-2653.full-text.pdf	3006	0	0	0	2	0	4	2	0	0	0	0	0	0	0	0	0					0	0	0	2	0	4	2	0
author396	usa	10.199	http://clincancerres.aacrjournals.org/content/early/2018/01/03/1078-0432.CCR-17-2653.full-text.pdf	3006	0	0	0	0	0	0	0	0	0	0	0	0	0	0	0	0					0	0	0	0	0	0	0	0
author397		10.199
author398	usa	10.199	http://clincancerres.aacrjournals.org/content/early/2018/01/03/1078-0432.CCR-17-2653.full-text.pdf	3006	0	0	0	0	0	0	0	0	0	0	0	0	0	0	0	0					0	0	0	0	0	0	0	0
author399	usa	10.199	http://clincancerres.aacrjournals.org/content/early/2018/01/03/1078-0432.CCR-17-2653.full-text.pdf	3006	0	0	0	0	3	0	0	0	0	0	0	0	0	0	0	0					0	0	0	0	3	0	0	0
author400	usa	10.199	http://clincancerres.aacrjournals.org/content/early/2018/01/03/1078-0432.CCR-17-2653.full-text.pdf	3006	0	0	0	0	0	0	0	0	0	0	0	0	0	0	0	0					0	0	0	0	0	0	0	0
author401	usa	10.199	http://clincancerres.aacrjournals.org/content/early/2018/01/03/1078-0432.CCR-17-2653.full-text.pdf	3006	n/a	n/a	n/a	n/a	n/a	n/a	n/a	0	0	0	0	0	0	0	0	0
author402	usa	10.199	http://clincancerres.aacrjournals.org/content/early/2018/01/03/1078-0432.CCR-17-2653.full-text.pdf	3006	0	0	0	0	0	0	0	0	0	0	0	0	0	0	0	0					0	0	0	0	0	0	0	0
author403	usa	10.199	http://clincancerres.aacrjournals.org/content/early/2018/01/03/1078-0432.CCR-17-2653.full-text.pdf	3006	0	0	0	0	0	0	0	0	0	0	0	0	0	0	0	0					0	0	0	0	0	0	0	0
author404	usa	10.199	http://clincancerres.aacrjournals.org/content/early/2018/01/03/1078-0432.CCR-17-2653.full-text.pdf	3006	n/a	n/a	n/a	n/a	n/a	n/a	n/a	0	0	0	0	0	0	0	0	0
author405	usa	10.199	http://clincancerres.aacrjournals.org/content/early/2018/01/03/1078-0432.CCR-17-2653.full-text.pdf	3006	n/a	n/a	n/a	n/a	n/a	n/a	n/a	0	0	0	0	0	0	0	0	0
author406	usa	10.199	http://clincancerres.aacrjournals.org/content/early/2018/01/03/1078-0432.CCR-17-2653.full-text.pdf	3006	0	0	0	0	0	0	0	0	0	0	0	0	0	0	0	0					0	0	0	0	0	0	0	0
author407		10.199	http://clincancerres.aacrjournals.org/content/early/2018/01/03/1078-0432.CCR-17-2653.full-text.pdf	3006
author408		10.199	http://clincancerres.aacrjournals.org/content/early/2018/01/03/1078-0432.CCR-17-2653.full-text.pdf	3006
author409		10.199	http://clincancerres.aacrjournals.org/content/early/2018/01/03/1078-0432.CCR-17-2653.full-text.pdf	3006
author410	usa	32.621	https://www.ncbi.nlm.nih.gov/pubmed/29867230	4505	0	0	0	10	0	1	0	0	0	0	0	10	0	1	0	0					0	0	0	0	0	0	0	0
author411		32.621	https://www.ncbi.nlm.nih.gov/pubmed/29867230	4505
author412	usa	32.621	https://www.ncbi.nlm.nih.gov/pubmed/29867230	4505	0	0	1	14	0	0	0	0	0	0	0	7	0	0	0	0					0	0	1	7	0	0	0	0
author413	usa	32.621	https://www.ncbi.nlm.nih.gov/pubmed/29867230	4505	0	0	0	4	0	6	1	0	0	0	0	5	0	6	0	0					0	0	0	-1	0	0	1	0
author414	usa	32.621	https://www.ncbi.nlm.nih.gov/pubmed/29867230	4505	0	0	0	1	0	3	1	0	0	0	0	0	0	3	0	0					0	0	0	1	0	0	1	0
author415	europe	32.621	https://www.ncbi.nlm.nih.gov/pubmed/29867230	4505	0	0	0	0	0	0	0	0	0	0	7	0	0	5	0	0					0	0	-7	0	0	-5	0	0
author416	usa	32.621	https://www.ncbi.nlm.nih.gov/pubmed/29867230	4505	0	0	0	0	0	6	0	0	0	0	0	0	0	1	0	0					0	0	0	0	0	5	0	0
author417	usa	32.621	https://www.ncbi.nlm.nih.gov/pubmed/29867230	4505	0	0	0	4	0	5	0	0	0	0	0	6	0	4	0	0					0	0	0	-2	0	1	0	0
author418	usa	32.621	https://www.ncbi.nlm.nih.gov/pubmed/29867230	4505	0	0	3	8	0	1	0	0	0	0	12	11	0	1	0	0					0	0	-9	-3	0	0	0	0
author419	usa	32.621	https://www.ncbi.nlm.nih.gov/pubmed/29867230	4505	n/a	n/a	n/a	n/a	n/a	n/a	n/a	0	0	0	0	0	0	0	0	0
author420	usa	32.621	https://www.ncbi.nlm.nih.gov/pubmed/29867230	4505	0	3	0	29	0	0	0	10	0	3	0	23	0	0	0	0					0	0	0	6	0	0	0	10
author421	usa	32.621	https://www.ncbi.nlm.nih.gov/pubmed/29867230	4505	0	0	0	0	0	7	0	0	0	0	0	0	0	0	0	0					0	0	0	0	0	7	0	0
author422	usa	32.621	https://www.ncbi.nlm.nih.gov/pubmed/29867230	4505	n/a	n/a	n/a	n/a	n/a	n/a	n/a	0	0	0	0	0	0	8	0	0
author423	usa	32.621	https://www.ncbi.nlm.nih.gov/pubmed/29867230	4505	0	0	6	6	0	15	2	0	0	0	5	5	0	11	0	2					0	0	1	1	0	4	2	-2
author424	usa	32.621	https://www.ncbi.nlm.nih.gov/pubmed/29867230	4505	0	0	7	5	6	4	0	0	0	0	0	0	0	0	0	0					0	0	7	5	6	4	0	0
author425	europe	32.621	https://www.ncbi.nlm.nih.gov/pubmed/29867230	4505	n/a	n/a	n/a	n/a	n/a	n/a	n/a	0	0	0	0	0	0	0	0	0
author426	europe	32.621	https://www.ncbi.nlm.nih.gov/pubmed/29867230	4505	0	0	3	5	0	2	3	0	0	0	3	5	0	2	3	0					0	0	0	0	0	0	0	0
author427	europe	32.621	https://www.ncbi.nlm.nih.gov/pubmed/29867230	4505	0	0	0	0	0	0	0	0	0	0	0	7	0	0	0	0					0	0	0	-7	0	0	0	0
author428	europe	32.621	https://www.ncbi.nlm.nih.gov/pubmed/29867230	4505	0	0	0	0	0	0	0	0	0	0	0	0	0	0	0	0					0	0	0	0	0	0	0	0
author429	europe	32.621	https://www.ncbi.nlm.nih.gov/pubmed/29867230	4505	n/a	n/a	n/a	n/a	n/a	n/a	n/a	0	0	0	0	0	0	0	0	0
author430	europe	32.621	https://www.ncbi.nlm.nih.gov/pubmed/29867230	4505	n/a	n/a	n/a	n/a	n/a	n/a	n/a	0	0	0	0	0	0	15	0	0
author431	usa	32.621	https://www.ncbi.nlm.nih.gov/pubmed/29867230	4505	0	0	2	15	0	12	0	0	0	0	0	15	0	12	0	0					0	0	2	0	0	0	0	0
author432		32.621	https://www.ncbi.nlm.nih.gov/pubmed/29867230	4505
author433		32.621	https://www.ncbi.nlm.nih.gov/pubmed/29867230	4505
author434		32.621	https://www.ncbi.nlm.nih.gov/pubmed/29867230	4505
author435		32.621	https://www.ncbi.nlm.nih.gov/pubmed/29867230	4505
author436		32.621	https://www.ncbi.nlm.nih.gov/pubmed/29867230	4505
author437		32.621	https://www.ncbi.nlm.nih.gov/pubmed/29867230	4505
author438		32.621	https://www.ncbi.nlm.nih.gov/pubmed/29867230	4505
author439		32.621	https://www.ncbi.nlm.nih.gov/pubmed/29867230	4505
author440		32.621	https://www.ncbi.nlm.nih.gov/pubmed/29867230	4505
author441	europe	32.621	https://www.ncbi.nlm.nih.gov/pubmed/29867230	4505	0	0	0	5	0	2	0	0	0	0	3	5	0	2	0	2					0	0	-3	0	0	0	0	-2
author442	ROW	21.466	https://www.ncbi.nlm.nih.gov/pubmed/29056570	2006	0	0	4	4	0	0	0	0	0	0	0	1	0	1	0	0					0	0	4	3	0	-1	0	0
author443	ROW	21.466	https://www.ncbi.nlm.nih.gov/pubmed/29056570	2006	0	0	0	0	0	0	0	0	0	0	0	0	0	0	0	0					0	0	0	0	0	0	0	0
author444	ROW	21.466	https://www.ncbi.nlm.nih.gov/pubmed/29056570	2006	0	0	7	7	4		0	0	0	0	0	1	0	1	0	0					0	0	7	6	4	-1	0	0
author445	ROW	21.466	https://www.ncbi.nlm.nih.gov/pubmed/29056570	2006	0	0	0	0	0	0	0	0	0	0	0	0	0	0	0	0					0	0	0	0	0	0	0	0
author446	ROW	21.466	https://www.ncbi.nlm.nih.gov/pubmed/29056570	2006	0	0	0	0	0	0	0	0	0	0	0	0	0	0	0	0					0	0	0	0	0	0	0	0
author447	ROW	21.466	https://www.ncbi.nlm.nih.gov/pubmed/29056570	2006	0	0	4	2	0	0		0	0	0	0	0	0	0	0	0					0	0	4	2	0	0	0	0
author448	ROW	21.466	https://www.ncbi.nlm.nih.gov/pubmed/29056570	2006	0	0	0	0	0	0	0	0	0	0	0	0	0	0	0	0					0	0	0	0	0	0	0	0
author449	ROW	21.466	https://www.ncbi.nlm.nih.gov/pubmed/29056570	2006	0	0	0	0	0	0	0	0	0	0	0	0	0	0	0	0					0	0	0	0	0	0	0	0
author450	ROW	21.466	https://www.ncbi.nlm.nih.gov/pubmed/29056570	2006	0	0	0	0	0	0	0	0	0	0	0	0	0	0	0	0					0	0	0	0	0	0	0	0
author451	ROW	21.466	https://www.ncbi.nlm.nih.gov/pubmed/29056570	2006	0	0	5	3	0	0	3	0	0	0	1	0	0	0	0	0					0	0	4	3	0	0	3	0
author452	ROW	21.466	https://www.ncbi.nlm.nih.gov/pubmed/29056570	2006	0	0	3	0	0	0	3	0	0	0	1	0	0	0	0	0					0	0	2	0	0	0	3	0
author453	usa	21.466	https://www.ncbi.nlm.nih.gov/pubmed/29056570	2006	0	0	0	8	0	12	0	0	0	0	1	0	0	1	0	0					0	0	-1	8	0	11	0	0
author454	ROW	21.466	https://www.ncbi.nlm.nih.gov/pubmed/29056570	2006	0	0	0	0	0	0	0	0	0	0	0	0	0	0	0	0					0	0	0	0	0	0	0	0
author455	usa	21.466	https://www.ncbi.nlm.nih.gov/pubmed/29056570	2006	0	0	0	2	0	4	0	0	0	0	0	1	0	1	0	0					0	0	0	1	0	3	0	0
author456		21.466	https://www.ncbi.nlm.nih.gov/pubmed/29056570	2006
author457		21.466	https://www.ncbi.nlm.nih.gov/pubmed/29056570	2006
author458		21.466	https://www.ncbi.nlm.nih.gov/pubmed/29056570	2006
author459		21.466	https://www.ncbi.nlm.nih.gov/pubmed/29056570	2006
author460	ROW	21.466	https://www.ncbi.nlm.nih.gov/pubmed/29056570	2006	0	0	6	15	0	0	0	0	0	0	0	1	0	1	0	0					0	0	6	14	0	-1	0	0
author461	usa	36.421	https://www.ncbi.nlm.nih.gov/pubmed/28592387	9506	0	0	0	5	0	7	0	0	0	0	0	4	0	4	0	0					0	0	0	1	0	3	0	0
author462	europe	36.421	https://www.ncbi.nlm.nih.gov/pubmed/28592387	9506	0	0	5	5	0	3	4	0	0	0	0	8	0	4	0	0					0	0	5	-3	0	-1	4	0
author463	europe	36.421	https://www.ncbi.nlm.nih.gov/pubmed/28592387	9506	0	0	0	6	0	0	0	0	0	0	0	6	0	0	0	0					0	0	0	0	0	0	0	0
author464	europe	36.421	https://www.ncbi.nlm.nih.gov/pubmed/28592387	9506	0	0	4	4	1	0	4	0	0	0	0	7	0	0	0	0					0	0	4	-3	1	0	4	0
author465	usa	36.421	https://www.ncbi.nlm.nih.gov/pubmed/28592387	9506	0	0	0	0	0	0	0	0	0	0	0	1	0	1	0	0					0	0	0	-1	0	-1	0	0
author466	europe	36.421	https://www.ncbi.nlm.nih.gov/pubmed/28592387	9506	0	0	4	4	4	0	2	0	0	0	0	4	0	1	0	0					0	0	4	0	4	-1	2	0
author467	europe	36.421	https://www.ncbi.nlm.nih.gov/pubmed/28592387	9506	0	0	0	0	5	0	2	0	0	0	0	5	0	0	0	0					0	0	0	-5	5	0	2	0
author468	europe	36.421	https://www.ncbi.nlm.nih.gov/pubmed/28592387	9506	0	0	0	0	0	0	0	0	0	0	0	0	0	0	0	0					0	0	0	0	0	0	0	0
author469	europe	36.421	https://www.ncbi.nlm.nih.gov/pubmed/28592387	9506	0	0	4	4	3	4	1	0	0	0	0	4	3	4	1	0					0	0	4	0	0	0	0	0
author470	europe	36.421	https://www.ncbi.nlm.nih.gov/pubmed/28592387	9506	0	0	0	3	2	0	3	0	0	0	0	0	0	0	0	0					0	0	0	3	2	0	3	0
author471	usa	36.421	https://www.ncbi.nlm.nih.gov/pubmed/28592387	9506	0	0	0	4	0	4	3	0	0	0	0	4	0	3	4	0					0	0	0	0	0	1	-1	0
author472	ROW	36.421	https://www.ncbi.nlm.nih.gov/pubmed/28592387	9506	0	0	0	5	0	0	0	0	0	0	0	6	0	0	0	0					0	0	0	-1	0	0	0	0
author473	europe	36.421	https://www.ncbi.nlm.nih.gov/pubmed/28592387	9506	0	0	4	6	0	0	3	0	0	0	0	9	0	0	3	0					0	0	4	-3	0	0	0	0
author474	europe	36.421	https://www.ncbi.nlm.nih.gov/pubmed/28592387	9506	0	0	4	4	0	0	0	0	0	0	0	4	0	0	0	0					0	0	4	0	0	0	0	0
author475	europe	36.421	https://www.ncbi.nlm.nih.gov/pubmed/28592387	9506	0	0	5	5	4	2	3	0	0	0	0	6	6	2	6	0					0	0	5	-1	-2	0	-3	0
author476	europe	36.421	https://www.ncbi.nlm.nih.gov/pubmed/28592387	9506	0	0	6	5	0	2		0	0	0	0	6	0	3	0	0					0	0	6	-1	0	-1	0	0
author477		36.421	https://www.ncbi.nlm.nih.gov/pubmed/28592387	9506
author478		36.421	https://www.ncbi.nlm.nih.gov/pubmed/28592387	9506
author479		36.421	https://www.ncbi.nlm.nih.gov/pubmed/28592387	9506
author480	ROW	36.421	https://www.ncbi.nlm.nih.gov/pubmed/28592387	9506	0	0	3	7	0	0	2	0	0	0	0	7	0	0	0	0					0	0	3	0	0	0	2	0
author481	europe	26.303	https://www.ncbi.nlm.nih.gov/pubmed/28892431	8506	0	0	0	0	0	0	1	0	0	0	0	0	0	0	1	0					0	0	0	0	0	0	0	0
author482	europe	26.303	https://www.ncbi.nlm.nih.gov/pubmed/28892431	8506	0	0	2	3	0	6	3	0	0	0	2	3	0	6	3	0					0	0	0	0	0	0	0	0
author483	europe	26.303	https://www.ncbi.nlm.nih.gov/pubmed/28892431	8506	0	0	0	0	6	0	0	0	0	0	0	0	6	0	0	0					0	0	0	0	0	0	0	0
author484	ROW	26.303	https://www.ncbi.nlm.nih.gov/pubmed/28892431	8506	0	0	0	9	0	2	2	0	0	0	0	9	0	2	3	0					0	0	0	0	0	0	-1	0
author485	europe	26.303	https://www.ncbi.nlm.nih.gov/pubmed/28892431	8506	0	0	6	5	0	6	0	0	0	0	6	5	0	6	0	0					0	0	0	0	0	0	0	0
author486	europe	26.303	https://www.ncbi.nlm.nih.gov/pubmed/28892431	8506	0	0	7	3	0	1	0	0	0	0	7	3	0	1	0	0					0	0	0	0	0	0	0	0
author487	ROW	26.303	https://www.ncbi.nlm.nih.gov/pubmed/28892431	8506	0	0	5	3	0	0	3	0	0	0	5	3	0	1	0	0					0	0	0	0	0	-1	3	0
author488	ROW	26.303	https://www.ncbi.nlm.nih.gov/pubmed/28892431	8506	0	0	0	0	0	1	4	0	0	0	0	0	0	1	4	0					0	0	0	0	0	0	0	0
author489	europe	26.303	https://www.ncbi.nlm.nih.gov/pubmed/28892431	8506	0	0	10	10	10	0	0	0	0	0	10	8	10	0	0	0					0	0	0	2	0	0	0	0
author490	europe	26.303	https://www.ncbi.nlm.nih.gov/pubmed/28892431	8506	n/a	n/a	n/a	n/a	n/a	n/a	n/a	0	0	0	0	0	0	0	3	0
author491	europe	26.303	https://www.ncbi.nlm.nih.gov/pubmed/28892431	8506	0	0	0	10	0	1	0	0	0	0	0	10	0	1	0	0					0	0	0	0	0	0	0	0
author492	europe	26.303	https://www.ncbi.nlm.nih.gov/pubmed/28892431	8506	0	0	0	4	0	0	0	0	0	0	0	4	0	0	0	0					0	0	0	0	0	0	0	0
author493	usa	26.303	https://www.ncbi.nlm.nih.gov/pubmed/28892431	8506	0	0	1	1	0	1	0	0	0	0	1	1	0	1	0	0					0	0	0	0	0	0	0	0
author494		26.303	https://www.ncbi.nlm.nih.gov/pubmed/28892431	8506
author495		26.303	https://www.ncbi.nlm.nih.gov/pubmed/28892431	8506
author496		26.303	https://www.ncbi.nlm.nih.gov/pubmed/28892431	8506
author497		26.303	https://www.ncbi.nlm.nih.gov/pubmed/28892431	8506
author498	europe	26.303	https://www.ncbi.nlm.nih.gov/pubmed/28892431	8506	0	0	5	1	2	0	1	0	0	0	5	1	2	0	1	0					0	0	0	0	0	0	0	0
author499	ROW	26.303	https://www.ncbi.nlm.nih.gov/pubmed/28892431	8506	0	0	9	10	0	0	0	0	n/a	n/a	n/a	n/a	n/a	n/a	n/a	0
author500	ROW	26.303	https://www.ncbi.nlm.nih.gov/pubmed/28892431	8506	0	0	0	3	0	0	1	0	n/a	n/a	n/a	n/a	n/a	n/a	n/a	0
author501	europe	26.303	https://www.ncbi.nlm.nih.gov/pubmed/28892431	8506	0	0	0	0	0	2	0	0	n/a	n/a	n/a	n/a	n/a	n/a	n/a	0
author502		26.303	https://www.ncbi.nlm.nih.gov/pubmed/28892431	8506
